1 **AXL-TBK1 driven nuclear AKT3 promotes metastasis**

2  
3 Emily N. Arner<sup>1,2,\*</sup>, Jill M. Westcott<sup>2</sup>, Stefan Hinz<sup>3,4</sup>, Crina Elena Tiron<sup>3,5</sup>, Magnus Blø<sup>4</sup>, Anja  
4 Mai<sup>4</sup>, Reetta Virtakoivu<sup>6</sup>, Natalie Phinney<sup>1,2</sup>, Silje Nord<sup>7</sup>, Kristina Y. Aguilera<sup>4</sup>, Ali Rizvi<sup>2</sup>, Jason  
5 E. Toombs<sup>2</sup>, Tanner Reese<sup>1</sup>, Vidal Fey<sup>6</sup>, David Micklem<sup>4</sup>, Gro Gausdal<sup>4</sup>, Johanna Ivaska<sup>6</sup>,  
6 James B. Lorens<sup>3,#</sup>, Rolf A. Brekken<sup>1,2,8,9,#</sup>

7  
8 <sup>1</sup>Cancer Biology Graduate Program, <sup>2</sup>Department of Surgery & the Hamon Center for  
9 Therapeutic Oncology Research, <sup>8</sup>Department of Pharmacology, University of Texas  
10 Southwestern Medical Center, Dallas, TX, 75390, USA

11  
12 <sup>3</sup>Department of Biomedicine & Centre for Cancer Biomarkers, University of Bergen, Norway

13  
14 <sup>4</sup>BerGenBio ASA, Bergen, Norway

15  
16 <sup>5</sup>Regional Institute of Oncology, Iasi, Romania

17  
18 <sup>6</sup>Turku Bioscience Center, University of Turku and Abo Akademi University, Department of Life  
19 Technologies, University of Turku, FIN-20520, Turku, Finland

20  
21 <sup>7</sup>Department of Cancer Genetics, Institute for Cancer Research, Oslo University Hospital

22  
23 <sup>9</sup>Lead Contact

24  
25 \*Current affiliation: Division of Hematology/Oncology, Department of Medicine, Vanderbilt  
26 University Medical Center, Nashville, TN 37232 USA

27  
28 Running title: Nuclear AKT3 drives metastasis

29  
30  
31 **#Corresponding authors:**

32 Rolf A. Brekken, PhD  
33 Hamon Center for Therapeutic Oncology Research  
34 UT Southwestern Medical Center  
35 6000 Harry Hines Blvd.  
36 Dallas, TX 75390-8593 USA  
37 rolf.brekken@utsouthwestern.edu

James B. Lorens, PhD  
Department of Biomedicine  
University of Bergen  
Jonas Lies vei 91  
N-5009 Bergen, Norway  
jim.lorens@uib.no

38  
39 **Number of figures, tables:** 8 figures, 6 supplemental, 2 supplemental table, 60,242 characters

40 **Declarations of interest:** RAB received research support from BerGenBio ASA for unrelated  
41 work; SH, AM, KYA, GG, DM, MB, JBL are or were employees of BerGenBio ASA; JBL and DM  
42 have ownership interest in BerGenBio ASA. The remaining authors do not have potential  
43 conflicts of interest.

44  
45  
46  
47  
48  
49  
50

51 **Abstract**

52 Epithelial-to-mesenchymal transition (EMT) contributes to tumor cell survival, immune evasion,  
53 migration, invasion, and therapy resistance. Across human cancer, tumors that are high grade,  
54 poorly differentiated, and have undergone EMT carry a worse prognosis with a higher likelihood  
55 of metastasis. AXL, a receptor tyrosine kinase, drives EMT and is implicated in tumor  
56 progression, metastasis, and therapy resistance in multiple cancer types including pancreatic  
57 cancer and breast cancer. TANK-binding kinase 1 (TBK1) is central to AXL-driven EMT yet, the  
58 mechanism of how TBK1 induces EMT remains unclear. Here, we report that AXL activation  
59 stimulates TBK1 binding and phosphorylation of AKT3. TBK1 activation of AKT3 drives binding  
60 and phosphorylation of slug/snail resulting in protection from proteasomal degradation and  
61 translocation of the complex into the nucleus. We show that nuclear translocation of AKT3 is  
62 required for AXL-driven EMT and metastasis. Congruently, nuclear AKT3 expression correlates  
63 with worse outcome in aggressive breast cancer. To advance AKT3 as a therapeutic target, an  
64 AKT3-isoform selective allosteric small molecule inhibitor, BGB214, was developed. BGB214  
65 inhibits AKT3 nuclear translocation, EMT-TF stability, AKT3-mediated invasion of breast cancer  
66 cells and reduces tumor initiation in vivo. Our results suggest that AKT3 nuclear activity is an  
67 important feature of AXL-driven epithelial plasticity and that selective AKT3 inhibition represents  
68 a novel therapeutic avenue for treating aggressive cancer.

69

70 **Significance**

71 Nuclear AKT3 activity is an important feature of AXL-TBK1 driven EMT and metastasis, thus  
72 selective AKT3 targeting represents a novel approach to treat aggressive cancer.

73

74 **Keywords:** AKT3/AXL/EMT/invasion/TBK1

75

## 76 **Introduction**

77 Cancer metastasis, the leading cause of cancer mortality correlates with epithelial-to-  
78 mesenchymal transition (EMT) (1, 2). Metastasis of epithelial tumors, such as pancreatic cancer  
79 (PDA), requires cancer cells to escape epithelial nests, invade surrounding stroma, intravasate  
80 into blood or lymphatic vessels, survive circulation, and extravasate at a secondary site, where  
81 successful cells form micrometastases and eventually macrometastases (3). The escape of  
82 tumor cells from tumor cell nests encapsulated by a basement membrane can be facilitated by  
83 tumor cell epithelial plasticity, which results in epithelial tumor cells losing contact with the  
84 basement membrane and nearby cells while adopting mesenchymal-like features that enhance  
85 cell migration and invasion. While epithelial plasticity alters morphology and cell-cell contact it  
86 also enables tumor cell survival under stressful environmental conditions, such as  
87 chemotherapy and radiation (4-7).

88 In carcinomas, the manifestation of an EMT program is associated with tumor grade. High-  
89 grade cancer is characterized by a loss of normal tissue structure and architecture. High-grade  
90 tumors are often described as poorly differentiated, displaying tumor cells that have undergone  
91 full or partial EMT. In contrast, low-grade tumors that retain an epithelial phenotype are  
92 characterized as well-differentiated. Across human cancer, tumors that are high grade and  
93 poorly differentiated carry a worse prognosis with a high likelihood of metastasizing to distant  
94 organs (8). Understanding the molecular mechanisms underlying cellular plasticity and  
95 metastasis may reveal novel ways to target these programs for effective therapies.

96 Many signaling pathways can mediate tumor cell epithelial plasticity, including the receptor  
97 tyrosine kinase (RTK) AXL (9-11), elevated expression of which correlates with metastasis and  
98 resistance to therapy (9, 12). AXL is a member of the TAM (Tyro3, AXL, MerTK) family of RTKs  
99 (13) and is activated by its ligand, growth arrest-specific gene 6 (GAS6) to promote a variety of  
100 cellular processes, including epithelial plasticity, cell survival, proliferation and migration (9). We  
101 have previously shown that the serine threonine protein kinase TANK-binding kinase 1 (TBK1)

102 promotes EMT downstream of AXL in PDA, providing insight into a novel function for TBK1 (14).  
103 While the precise mechanism of how TBK1 drives EMT has yet to be determined, previous  
104 work found that TBK1 can directly activate AKT (15).

105 AKT is a key regulator of many cellular phenotypes associated with cancer, including cell  
106 survival, proliferation, and metastasis (16). Activation of AKT can drive EMT via the induction of  
107 EMT transcription factors (EMT-TFs) including snail and slug, which transcriptionally repress E-  
108 cadherin and induce vimentin, twist1, MMP-2, and MMP-9 that promote tumor cell invasion (7,  
109 17, 18). There are three mammalian AKT isoforms (AKT1, AKT2, and AKT3). While each  
110 isoform is encoded by distinct genes, there is ~80% amino acid sequence identity and each  
111 isoform appears to be activated by similar mechanisms (19, 20). Although the function of AKT in  
112 general in cancer cell survival and growth has been well characterized, the contribution of  
113 different AKT isoforms has not been investigated as intensely and is often under appreciated.  
114 Based on a phosphoproteomics screen, AKT isoforms have specific expression patterns and  
115 serve different functions in cell signaling and cancer (21). Although it is the least studied  
116 isoform, AKT3 has been implicated in various aspects of EMT, including tumor progression,  
117 DNA damage repair response, and drug resistance (22-25).

118 Here we report a novel mechanism in which nuclear AKT3 is vital to AXL-TBK1 driven EMT  
119 by stabilizing the EMT transcription factors slug and snail. Additionally, we report the first AKT  
120 isoform specific small molecule inhibitor, BGB214, which is an AKT3-isoform selective allosteric  
121 small molecule inhibitor. BGB214 inhibits EMT-TF stability, AKT3-mediated invasion, and tumor  
122 initiation in vivo. Lastly, we show that AKT expression drives metastasis in vivo and nuclear  
123 AKT3 expression correlates with aggressive cancer. Our findings suggest that nuclear AKT3  
124 activity is an important feature of AXL-driven epithelial plasticity and that selective AKT3  
125 targeting represents a novel therapeutic avenue for treating aggressive cancer.

126

127

128 **Results**

129 AKT3 promotes EMT via TBK1

130 AXL activation promotes tumor cell migration and invasion (26). Consistent with this, *AXL*  
131 mRNA expression correlates with EMT and stem cell-related gene expression in breast cancer  
132 cell lines and patient breast carcinoma biopsies, but not normal breast tissue (Supplemental  
133 Figure 1A-C). Furthermore, IHC analysis of patient primary breast tumor biopsies revealed *AXL*  
134 protein expression correlates with expression of mesenchymal markers N-cadherin and *twist2*  
135 (Supplemental Figure 1D). Interestingly, analysis of publicly available GEO RNA sequencing  
136 data of breast cancer cell lines showed that while *AXL* and *AKT3* correlate significantly, *AXL*  
137 and *AKT1* or *AKT2* do not (Figure 1A). Similar results were found by analyzing the correlation of  
138 AKT isoforms and *AXL* in human breast cancer using gene expression profiling interactive  
139 analysis (GEPIA) in invasive breast carcinoma (BRCA) from the TCGA database (Supplemental  
140 Figure 2A) (27). *AKT1* and *AKT2* showed no correlation with *AXL*, whereas *AKT3* correlated  
141 significantly with *AXL* expression in BRCA ( $p$ -value =  $4.4 \times 10^{-110}$ ,  $R = 0.61$ ). In vitro, forced  
142 expression of slug in the epithelial breast line MCF10a (for cell line information see  
143 Supplemental Table 1) drives EMT and induces *AXL* and *AKT3* expression, while *AKT1* and  
144 *AKT2* levels were not elevated (Supplemental Figure 2B). Additionally, when *AXL* was knocked  
145 down in these cells, *AKT3* was no longer expressed (Supplemental Figure 2B), supporting the  
146 correlation between *AXL* and *AKT3*.

147 To investigate the function of AKT isoforms in EMT, MCF10a cells were treated for 4 days  
148 with TGF $\beta$ , a potent EMT inducer, after which each AKT isoform was immunoprecipitated and  
149 probed for phosphorylation (S473). We found that TGF $\beta$ -induced EMT results in  
150 phosphorylation of *AKT3*, but not *AKT1* or *AKT2*, supporting that *AKT3* is selectively associated  
151 with EMT (Supplemental Figure 2C). To further test the function of *AKT3*, CRISPR knockout of  
152 *AKT3* was done in a primary pancreatic cancer cell line derived from

153 *Kras*<sup>LSL-G12D/+</sup> *Trp53*<sup>fl/fl</sup> *Pdx1*<sup>Cre/+</sup> (KPFC), a genetically engineered mouse model (GEMM) of PDA.  
154 In the absence of AKT3, mesenchymal markers zeb-1, vimentin, and slug were reduced, while  
155 the epithelial marker E-Cadherin was increased in two different clones (AKT3 KO A and AKT3  
156 KO B) compared to the Cas-9 empty vector (CAS9-EV) control, confirming the function of AKT3  
157 in EMT (Figure 1B).

158 Given the correlation of AKT3 with AXL and EMT, we sought to determine if AKT3  
159 contributes to AXL-mediated EMT. To mimic constitutively active AKT1 or 3, MCF10a cells were  
160 transduced with retroviral vectors expressing myristoylated AKT1 (myrAKT1) or myristoylated  
161 AKT3 (myrAKT3) and analyzed for changes associated with EMT (protein expression and  
162 morphology, Supplemental Figure 2D, E). Transduction of myrAKT1 did not alter cellular  
163 phenotype. However, myrAKT3 transduction resulted in robust changes in cell phenotype as  
164 well as EMT protein changes. Expression of AXL and mesenchymal markers vimentin and N-  
165 cadherin were elevated and the cells displayed a more invasive and mesenchymal-like  
166 morphology in 2D and 3D (embedded in matrigel), suggesting constitutively active AKT3 can  
167 drive EMT (Supplemental Figure 2D, E). To investigate if AKT3 is activated downstream of AXL,  
168 PANC1 cells were treated with DMSO, GAS6, or GAS6 and a neutralizing monoclonal anti-AXL  
169 antibody, tilvestamab. Probing for pAKT3 indicated that AKT3 can be activated in an AXL  
170 specific manner (Supplemental Figure 2F).

171 Our prior studies established that TBK1 promotes EMT downstream of AXL in PDA (14).  
172 Although the mechanism by which TBK1 drives EMT remains unclear, prior evidence shows  
173 that TBK1 can directly activate AKT (15, 16). Given our previous findings that AKT is activated  
174 downstream of AXL in a TBK1-dependent manner (14) we hypothesized that TBK1 binds to and  
175 activates AKT3 to drive EMT downstream of AXL. To test this, we treated MDA-MB-231 cells  
176 with DMSO, GAS6, or GAS6 plus BGB324 (R428; bemcentinib), a small molecule AXL kinase  
177 inhibitor (12, 28). Immunoprecipitation of TBK1 revealed that TBK1 binds to AKT3, and that AXL  
178 stimulation results in the phosphorylation of TBK1 and AKT3 (Figure 1C). Furthermore, BGB324

179 inhibited GAS6-induced activation of TBK1 and AKT3. To investigate TBK1-AKT3 interaction  
180 further, we used primary cell lines developed from GEMMs of pancreatic cancer, *TBK1<sup>+/+</sup> KIC*  
181 (*Kras<sup>LSL-G12D/+</sup> ; Cdkn2a<sup>Lox/Lox</sup> ; Ptf1a<sup>Cre/</sup>*) or *TBK1-mutant (TBK1<sup>ΔΔ</sup>) KIC* mice (14), which are  
182 deficient in TBK1 kinase activity. We found that AKT3 is phosphorylated in *TBK1<sup>+/+</sup> KIC* cells but  
183 not in *TBK1<sup>ΔΔ</sup> KIC* cells (Figure 1D), supporting the hypothesis that TBK1 can activate AKT3. To  
184 investigate if TBK1 can directly bind to and activate AKT3 we performed an in vitro kinase  
185 activity assay with human recombinant TBK1 and AKT3 using cold ATP. Mass-spectrometry  
186 analysis confirmed that TBK1 directly phosphorylates AKT3 at serine 472 (Supplemental Figure  
187 2G).

188 To investigate if AKT3 induces EMT downstream of TBK1, we transduced *KIC TBK1<sup>ΔΔ</sup>* cells  
189 with myrAKT3 (*TBK1<sup>ΔΔ</sup>/myrAKT3*) and found that myrAKT3 rescues expression of  
190 mesenchymal markers, vimentin and slug, and decreases the expression of E-cadherin (Figure  
191 1E), demonstrating that myrAKT3 induces a mesenchymal-like phenotype in TBK1-mutant PDA  
192 cells. To evaluate if the protein changes seen in Figure 1E result in a phenotypic change, we  
193 cultured *TBK1<sup>+/+</sup>*, *TBK1<sup>ΔΔ</sup>*, and *TBK1<sup>ΔΔ</sup>/myrAKT3 KIC* cells in collagen/matrigel and found that  
194 *TBK1<sup>+/+</sup>* cells were invasive with elongated morphology while *TBK1<sup>ΔΔ</sup>* cells were epithelial and  
195 less elongated (Figure 1F). Interestingly, *TBK1<sup>ΔΔ</sup>/myrAKT3* cells reverted to a mesenchymal-like  
196 morphology, similar to *TBK1<sup>+/+</sup>* cells, suggesting constitutively active AKT3 is sufficient to drive  
197 EMT, even in the absence of TBK1. These data support that AKT3 is downstream of TBK1 and  
198 is required for TBK1 driven EMT.

199

#### 200 AXL-TBK1 is required for AKT3 nuclear localization

201 It has been reported that while AKT1 and AKT2 are found in the cytoplasm and  
202 mitochondria, respectively, AKT3 is often found in the nucleus (29). We observed clear nuclear  
203 localization of AKT3 in MDA-MB-231 and MCF10A/slug cells (30) (Supplemental Figure 3A,B).  
204 Interestingly, AXL silencing in MCF10a/slug cells reduced AKT3 nuclear localization, suggesting

205 that AXL mediates the nuclear localization of AKT3 (Supplemental Figure 3B). These data were  
206 validated further with cell fractionation experiments where AKT3 was primarily detected in  
207 nuclear fractions of MDA-MB-231 cells (Figure 2A) and HMLER cells transduced with myrAKT3  
208 (Supplemental Figure 3C).

209 To determine if TBK1 contributes to the nuclear localization of AKT3, immunofluorescence  
210 of AKT3 in *TBK1*<sup>+/+</sup>, *TBK1*<sup>ΔΔ</sup>, and *TBK1*<sup>ΔΔ</sup>/myrAKT3 *KIC* and MDA-MB-231 cells (Figure 2B, C)  
211 was performed. The percentage of cells with nuclear AKT3 was reduced ~80% in the absence  
212 of functional TBK1 in *KIC* cells. This effect was partially rescued by myrAKT3, suggesting that  
213 AKT3 activation by TBK1 contributes to AKT3 nuclear localization. Furthermore, when MDA-  
214 MB-231/GFP cells were treated with BGB324 to inactivate AXL, thereby preventing TBK1  
215 activation, AKT3 did not translocate to the nucleus (Figure 2D). To investigate how AXL affects  
216 nuclear localization of AKT3, MDA-MB-231 (Supplemental Figure 3D) and PANC1  
217 (Supplemental Figure 3E) cells were treated with serum free media (SFM), GAS6, or GAS6 +  
218 BGB324 for 12 hrs. Immunocytochemistry for AKT3 in MDA-MB-231 cells demonstrated that  
219 AKT3 was nuclear localized in 15.9% of cells treated with serum free media (SFM) while GAS6  
220 treatment resulted in 47.1% of cells showing nuclear AKT3 (Supplemental Figure 3D). In  
221 contrast, AXL inhibition with BGB324, decreased nuclear AKT3 to only 2.9% of cells, supporting  
222 that AXL stimulation induces the nuclear localization of AKT3. Similar effects were observed in  
223 PANC1 cells (Supplemental Figure 3E). To demonstrate that inhibition of AKT3 nuclear  
224 localization is not a general phenomenon associated with RTK inhibition, HMECs were treated  
225 with imatinib, an inhibitor of ABL/CKIT/PDGFR. BGB324 reduced nuclear AKT3 but the imatinib  
226 did not (Supplemental Figure 3F-G).

227 Proteins over 40 kDa must be actively transported through the nuclear membrane by  
228 importins, which recognize and bind nuclear location sequences (NLS) (31). We used a web-  
229 based NLS mapper (32) and identified a weak bipartite NLS in the AKT3 amino acid sequence  
230 (accession number: Q9Y243) located in a flexible linker region between the PH-domain and



231 kinase domain (Supplemental Figure 4A). Based on these *in silico* findings we created two  
232 AKT3 mutant overexpression constructs: AKT3-NLS1 and AKT3-NLS2. AKT3-NLS1 carries two  
233 point-mutations (K141R and R142A) that alter the leucine rich NLS region to the sequence that  
234 resembles the linker area in AKT2 (Supplemental Figure 4A). For AKT3-NLS2, a 10 amino acid  
235 sequence flanking the NLS was replaced to mimic a longer part of the linker region as coded in  
236 AKT2. Wildtype AKT3 and the mutants were retrovirally delivered and expressed in HMLER  
237 cells (Supplemental Figure 4B). Immunocytochemical analyses showed clear subcellular  
238 localization differences between control, AKT3, AKT3-NLS1 and AKT3-NLS2 transfected cells  
239 (Supplemental Figure 4C). Wildtype AKT3 was predominantly (87%) nuclear localized; however,  
240 AKT3-NLS1 and AKT3-NLS2 mutants were largely restricted to the cytoplasm with 18% and  
241 29% nuclear localization, respectively. Immunoprecipitation of AKT3 in HMLER lysates and  
242 probing with  $\alpha$ -importin showed that the AKT3-NLS1 mutant had impaired interaction with  $\alpha$ -  
243 importin (Supplemental Figure 4D).

244 To further investigate the contribution of nuclear AKT3 to EMT, *KPFC* AKT3 KO cells were  
245 transduced with wildtype AKT3 or AKT3-NLS1 and cultured in collagen/matrigel (Figure 2E).  
246 Evaluation of invasion revealed that while AKT3 KO resulted in reduced invasive phenotype  
247 compared to control, when wildtype AKT3 was rescued so was the invasive phenotype.  
248 However, when AKT3-NLS was transduced into the AKT3 KO cells, invasion was no longer  
249 rescued (Figure 2E), suggesting that nuclear AKT3 is necessary to drive EMT.

250

### 251 Snail and slug are AXL-TBK1 dependent substrates of AKT3

252 EMT is orchestrated by a limited number of transcription factors, considered to be the  
253 ultimate inducers of EMT (EMT-TFs). These transcription factors include the zinc finger  
254 transcription repressors snail (*SNAI1*) and slug (*SNAI2*) (2, 33, 34). Previously, we found that  
255 the activation of TBK1 in AXL-driven metastasis drives the engagement of slug and snail (14).  
256 We used GEPIA analysis to evaluate the correlation between the mRNA expression levels of

257 SNAI2 and the different *AKT* isoforms in BRCA (Supplemental Figure 5A). Indeed, while *AKT3*  
258 correlated with *SNAI2* expression, *AKT1* and *AKT2* did not.

259 Given the presence of *AKT3* in the nucleus, we sought to determine if *AKT3* interacts with  
260 EMT-TFs. Immunoprecipitation of *AKT3* in *KIC* PDA cells revealed that *AKT3* associated with  
261 snail (Figure 3A). Furthermore, this complex remained intact in *KIC* PDA lines only when *TBK1*  
262 was functional (Figure 3A), suggesting *TBK1* is required for the interaction between *AKT3* and  
263 snail. When *PANC1* cells were treated with SFM or GAS6 (*PANC1* cells produce GAS6,  
264 therefore there is a baseline level of GAS6-AXL signaling in cells treated with SFM) for 12 hrs,  
265 snail was found to be in the nucleus and cytoplasm of the cells (Figure 3B). However, when *AXL*  
266 was inhibited with BGB324, snail translocation to the nucleus was significantly reduced,  
267 suggesting that the *AXL-TBK1-AKT3* pathway is involved in snail/sluc nuclear translocation.  
268 Similar results were found with slug in *MDA-MB-231* cells (Supplemental Figure 5B). This  
269 phenomenon was confirmed using imaging flow cytometry (Amnis Imagestream®), which clearly  
270 showed an ~80% reduction of cells that display nuclear slug after *AXL* inhibition (Figure 3C, D).

271

#### 272 AXL activity stabilizes snail/sluc via *TBK1-AKT3*

273 Given the interaction between *AKT3* and snail (Figure 3A) and the strong effect of *AKT3*  
274 expression on snail and slug expression (Figure 1B), we hypothesized that slug/snail activity is  
275 dependent on *AKT3* providing a stabilizing effect on slug/snail protein. To test this hypothesis,  
276 *MCF10a/sluc* cells were transfected with si*AKT3*. Even though slug was overexpressed to drive  
277 EMT in these cells (30), when *AKT3* was not present vimentin and *AXL* expression were  
278 substantially reduced (Figure 4A), supporting the hypothesis that *AKT3* is required for slug/snail  
279 EMT-inducing activity.

280 To determine if *AXL-AKT3* activity influences the protein stability of snail/sluc, we treated  
281 *PANC1* (Figure 4B) and *MDA-MB-231* (Figure 4C) cells with cycloheximide (CHX), a protein  
282 synthesis inhibitor, +/- GAS6 over a time course of 6 hrs. Consistent with previous findings (35)

283 snail had a half-life of 1 hr when treated with CHX. Interestingly, when AXL was activated with  
284 GAS6, the half-life of snail was prolonged to 4 hrs, suggesting AXL activity stabilizes slug/snail  
285 protein. To determine AKT3 involvement, we repeated the experiment in cells transduced with  
286 shAKT3 and found that the addition of GAS6 no longer had a stabilizing effect on snail. AKT3  
287 was similarly required for AXL-induced slug stability in MDA-MB-231 cells (Figure 4C). To  
288 determine whether snail protein is degraded by the proteasome or the lysosome, PANC1 cells  
289 were treated with a lysosome inhibitor (BafA1) or a proteasome inhibitor (MG-132) +/- GAS6 for  
290 8 hrs (Supplemental Figure 5C). Although BafA1 had no effect on snail expression levels, when  
291 cells were treated with MG-132, there was a robust increase of snail protein, indicating snail is  
292 degraded via the proteasome.

293 The F-box E3 ubiquitin ligase FBXW7 has been implicated in the degradation of snail/slug in  
294 multiple cancers (36-38). Xiao and colleagues showed when FBXW7 was targeted with shRNA  
295 in two different lung cancer cell lines, the expression of snail increased markedly (36). This  
296 finding was recapitulated in ovarian cancer cells (37). To evaluate if AXL-AKT3 protects slug  
297 from FBXW7 and therefore degradation, we used Imaging flow cytometry (Amnis  
298 Imagestream®) of MDA-MB-231 cells and scored co-expression of FBXW7 and slug (Figure  
299 4D). Interestingly, when MDA-MB-231 cells were treated with GAS6, FBXW7 and slug were  
300 rarely overlapping, but when AXL was inhibited using BGB324, overlap of the two proteins  
301 dramatically increased, suggesting that perhaps AXL-TBK1-AKT3 protects slug from FBXW7  
302 mediated degradation.

303

#### 304 Selective targeting of AKT3 with a novel allosteric small molecule inhibitor inhibits metastasis

305 Several drugs targeting pan-AKT activity (e.g. GDC0068, AXD5363, MK-2206) are currently  
306 in various stages of clinical testing. However, many of these trials report toxicity such as  
307 hyperglycemia and hyperinsulinemia due to the essential functions of AKT1 and AKT2 in tissue  
308 homeostasis (39-42). An AKT3 selective inhibitor has the potential to overcome these issues.

309 The similarity between AKT1, 2 and 3 in the kinase domain precludes selective kinase inhibition.  
310 However, an allosteric site located in a cleft between the PH domain and the kinase domain has  
311 been used to identify AKT1, AKT2 and AKT1/2-selective inhibitors (43-45). Sequence alignment  
312 around this allosteric site suggested that there are exploitable differences in this region (Figure  
313 5A). A structural model produced by comparison of the crystal structures of AKT1 (45) and the  
314 AKT2 kinase domain suggested that a single amino acid deletion in AKT2 and AKT3 compared  
315 to AKT1 leads to a change in the path that the protein backbone follows, opening up a pocket at  
316 the front of the allosteric binding site (Figure 5B). This pocket is small in the case of AKT2 due  
317 to the protrusion of the large side chain of Arg269, but larger in AKT3 due to the presence of a  
318 glycine at this site. A series of novel allosteric small molecule inhibitors of AKT3 were developed  
319 ([WO/2016/102672](#)) with backbones that bind to the allosteric site via the right hand side of the  
320 molecule with the group on the left making a bend to access the additional space, causing the  
321 molecule to clash with AKT1 Lysine 268. One example of these is BGB214 (N-(5-(4-(1-  
322 aminocyclobutyl)phenyl)-4-phenylpyridin-2-yl)-2-((1r,4r)-4-(N-  
323 methylacetamido)cyclohexyl)acetamide), a potent and selective AKT3 inhibitor (Figure 5C). In  
324 biochemical assays using purified tag-free enzymes, BGB214 had an IC<sub>50</sub> of 13 nM for AKT3  
325 with approximately 1000-fold selectivity against AKT1 and >35-fold selectivity against AKT2  
326 (Figure 5D).

327 To evaluate the efficacy of BGB214 to prevent aggressive cancer traits such as migration  
328 and 3D growth, MDA-MB-231 cells were plated in collagen/matrigel and treated with GAS6,  
329 GAS6 + BGB214, or GAS6 + BGB324 for 48 hrs (Figure 5E, F). Invasion over 50  $\mu$ m was  
330 determined and quantified revealing that inhibition of AXL or AKT3 substantially reduced cell  
331 migration/invasion (Figure 5F). Similarly, in an organotypic 3D growth assay, BGB214 dose-  
332 dependently prevented MDA-MB-231 growth (Supplemental Figure 6A), but did not significantly  
333 affect cell growth in 2D proliferation assays (Supplemental Figure 6B, C). Interestingly, BGB214

334 inhibition in PANC1 cells resulted in decreased expression of total snail (Supplemental Figure  
335 6D).

336 The specificity of BGB214 for pAKT3 was confirmed in a panel of cell lines in vitro and in  
337 vivo. HMLER-AKT3 or HMLER-GFP cells were treated with increasing concentrations of  
338 BGB214 (Supplemental Figure 6E). As HMLER-GFP cells have very low levels of AKT3  
339 endogenously, pAKT levels were only reduced when AKT3 was overexpressed, indicating that  
340 BGB214 selectively inhibits AKT3. In addition, MCF10-DCIS subcutaneous tumors treated with  
341 25 mg/kg BGB214 for 2-6 days specifically resulted in decreased pAKT3 with little effect on  
342 pAKT1 and pAKT2 (Supplemental Figure 6F).

343 To investigate the potential of BGB214 to prevent tumor initiation, HMLER cells transduced  
344 with control vector or AKT3 were pre-treated in vitro with BGB214 for 24 hours and then injected  
345 subcutaneously into NOD SCID mice at limiting dilutions ( $1 \times 10^5$ - $1 \times 10^6$  cells) and mice treated  
346 with BGB214 for 14 days (Supplemental Figure 6G). AKT3 inhibition by BGB214 significantly  
347 reduced the tumor initiation capacity of HMLER-AKT3 cells (Supplemental Figure 6G). The  
348 same reduction in tumor initiating capacity was observed following injection of HMLER-AKT3  
349 cells without in vitro treatment with BGB214 preceding injection (Supplemental Figure 6H). We  
350 conclude that inhibition of AKT3 with the allosteric inhibitor BGB214 prevents AKT3 mediated  
351 tumorigenic features such as invasion, 3D growth, EMT transcription factor stability and tumor  
352 initiation.

353

#### 354 AKT3 expression is associated with poorly differentiated tumors and increased metastasis

355 To assess the biologic consequence of AKT3, control *KPFC* cells (CAS9-EV), AKT3 KO  
356 KPFC cells (AKT3 KO), or AKT3 KO KPFC cells transduced with AKT3 (Rescue) were injected  
357 orthotopically into the pancreas of C57BL/6J mice (Figure 6). Primary tumor and metastatic  
358 burden was evaluated 19 days post injection. Although tumor weight did not differ significantly  
359 between the three groups (Figure 6B), gross metastatic burden was reduced in tumors lacking

360 AKT3 (Figure 6A). H&E analysis as well as CK19 (a PDA tumor cell marker, (46) IHC confirmed  
361 significantly reduced metastasis to livers of AKT3 KO tumor-bearing mice (Figure 6C-D).  
362 Consistent with this observation, tumors lacking AKT3 were more well-differentiated and  
363 expressed higher levels of E-Cadherin and lower levels of vimentin (Figure 6E). The expression  
364 of E-Cadherin and vimentin in vivo was consistent with the expression of these proteins in vitro  
365 (Figure 6F). Importantly, we observed that the expression level of AKT3 also correlated with the  
366 number of gross metastases (Figure 6A, F).

367

### 368 Nuclear AKT3 is associated with aggressive cancer and worse survival in patients

369 We next sought to evaluate the importance of nuclear AKT3 in cancer patients. To assess  
370 the location of AKT3 in pancreatic tumors from patients, IHC for AKT3 and AXL (Figure 7A)  
371 demonstrated that AXL<sup>+</sup> tumors displayed single cells outside epithelial ducts that expressed  
372 nuclear AKT3. However, in AXL<sup>-</sup> tumors, AKT3 was cytoplasmic, supporting our findings that  
373 AXL is associated with nuclear localization of AKT3 and this localization results in a less  
374 differentiated (more mesenchymal-like) tumor cell phenotype (Figure 7A).

375 To assess the effect of AKT3 expression in breast epithelial cells, we retrovirally  
376 overexpressed AKT3 in MCF10A cells and compared the mRNA expression pattern via RNA  
377 sequencing with MCF10A cells transduced with GFP control vector. We found 46 differentially  
378 expressed (DE) genes ( $FC \geq 2$ ,  $FDR < 0.05$ ) (Supplemental Table 2). The DE genes and their  
379 directionality were used to calculate an “AKT3 score” which was then mapped against probes in  
380 the Metabric database, which is composed of gene expression patterns from 1980 breast  
381 cancer patients. The patients were divided into two groups depending upon if the AKT3 score  
382 was above or below the mean. Plotting the AKT3 score against patient survival indicates that a  
383 high AKT3 score correlates with a significantly worse overall outcome (KM,  $p = 8e-9$ ) (Figure 7B).  
384 Further, we found a significantly different distribution between breast cancer subtypes (based on  
385 PAM50 intrinsic subtypes) and AKT3 scores ( $p = 4.3 \times 10^{-155}$ , Kruskal–Wallis test) (Figure 7C). ER

386 negative tumors are in general enriched for the AKT3 score, particularly basal-like tumors  
387 (Figure 7C). That high levels of AKT3 associated gene expression correlates with more  
388 aggressive forms of breast cancer, worse overall outcome, and a higher hazard ratio is  
389 consistent with previous reports of AKT3 high copy number alterations in TNBC patients (47,  
390 48) and reports that AKT3 expression is associated with higher grade breast cancer tumors  
391 (49). To validate our previous findings, we sought to determine if nuclear AKT3 was associated  
392 with worse overall survival. To evaluate this, we performed IHC for AKT3 in clinical breast  
393 cancer samples (Figure 7D, E). Grouping patients based on AKT3 subcellular localization  
394 revealed that nuclear AKT3 predicted a worse overall outcome (n=53 patients, p=0.0013 Log-  
395 rank test) in this cohort of patients. Together, these results suggest that nuclear AKT3 may be a  
396 therapeutic target that avoids toxicity associated with pan-AKT inhibition and a biomarker for  
397 worse overall survival and aggressive cancers.

398

## 399 **Discussion**

400 We report that AXL activation by its ligand GAS6 leads to the stimulation of TBK1 and  
401 subsequent selective activation of the AKT isoform, AKT3. Activation of AKT3 drives the binding  
402 of AKT3 to its substrate slug/snail, and translocation into the nucleus. The binding of AKT3 to  
403 slug/snail also protects the EMT-TFs from proteasomal degradation, potentially by preventing  
404 ubiquitinylation by FBWX7 (Figure 8). These results highlight the function of AKT3 in EMT and  
405 its potential value as a therapeutic target, inhibition of which could enhance sensitivity to  
406 standard therapy.

407 AKT activation is linked to fundamental signaling pathways underlying cancer development  
408 and progression. Many investigations have focused on the function of AKT1, AKT2, or panAKT,  
409 but have largely ignored AKT3. This may be because AKT3 is the least expressed of the three  
410 isoforms (50) and prior results on the function of AKT3 in tumorigenesis are inconsistent (22,  
411 51-55). Regardless, a few reports have suggested that AKT3 contributes to cancer progression,

412 including breast cancer (56-59). We predict that the inconsistency of AKT3 studies may be due  
413 to differential genetic contexts of the studies as well as to the fact that AKT3 can be expressed  
414 as two alternatively spliced variants, one which lacks S472 (60). In the study by Suyama et al.,  
415 overexpression of the AKT3 variant lacking S472 was associated with improved overall survival  
416 and reduced lung metastasis in preclinical models of breast cancer, whereas when AKT3 had  
417 the S472 phosphorylation site they saw increased tumorigenesis (60). This is consistent with  
418 our findings that phosphorylation on serine 472 via TBK1 is needed for AKT3 nuclear  
419 localization to promote EMT and metastasis.

420 Our previous studies have shown an increase in other EMT-TFs, such as ZEB1,  
421 downstream of AXL-TBK1 (14). Further studies are needed to evaluate if the AXL-TBK1-AKT3  
422 signaling cascade only influences protein expression of snail/slugs or multiple EMT-TFs.  
423 Additionally, in our study, we only interrogated this pathway in the context of AXL and AXL  
424 stimulation. It is possible that this mechanism may only be relevant in cell lines that contain high  
425 levels of AXL, which is supported by our finding that AXL is expressed in human PDAC tumors  
426 that display the nuclear localization of AKT3. Further studies are needed to understand if other  
427 RTKs can activate TBK1-AKT3 to stabilize snail/slugs.

428 In our study we find that the binding of AKT3 to slug/snail protects the EMT-TFs from  
429 proteasomal degradation, although more studies are needed to determine if FBXW7 is required  
430 for the degradation of slug/snail. It is possible that AKT3 does not directly stabilize EMT-TFs,  
431 but perhaps other proteins such as deubiquitinating enzymes (DUBs) promote the stability of  
432 these EMT-TFs in an AXL-TBK1 dependent manner. For example, the DUB USP10 has been  
433 shown to promote the stability of slug and snail in breast, ovarian, and lung cancer cell lines  
434 (61). Other potential candidate proteins that might be involved in the degradation of snail are the  
435 F-box ligases, of which FBX15 and FBXO11 have been shown to ubiquitinate and support the  
436 degradation of Snail (62). Another protein that has been implicated in regulating the expression  
437 of slug and AXL is the transcription factor  $\Delta$ Np63a, which has been shown to drive the migration



438 of basal breast cancer cells in part through elevation of the expression of AXL and slug, as well  
439 as miR-205 to silence ZEB1/2 (63).  $\Delta$ Np63a drives breast cancer invasion by selectively  
440 engaging certain proponents of the EMT program while still promoting the retention of epithelial  
441 characteristics to drive collective migration. Further studies are needed to evaluate the exact  
442 pathway by which slug/snail is degraded in an AXL-TBK1-AKT3 dependent manner.

443 These studies do not rule out that AKT3 affects other cell types such as macrophages; this  
444 is relevant given the function of TBK1 in innate immune signaling and the STING pathway. In  
445 fact, it has been reported that 7-DHC, a cholesterol precursor, regulates type I interferon  
446 production via AKT3 activation, where AKT3 directly binds and phosphorylates IRF3 on S385  
447 (64). Additionally, AKT3 (pS473) in macrophages has been shown to promote migration,  
448 proliferation, wound healing, and collagen organization (65). Interestingly, a recent study  
449 showed that AKT3 phosphorylated RNA processing proteins that regulate the alternative  
450 splicing of fibroblast growth factor receptors (FGFR), consistent with an importance of nuclear  
451 targeting of AKT3 in EMT maintenance (21).

452 In summary, our data support that nuclear AKT3 has utility as a potential biomarker for  
453 aggressive cancers that express AXL, and that AKT3 is a specific mediator of EMT signaling  
454 downstream of AXL. Additionally, as there are ongoing clinical trials targeting AXL in multiple  
455 cancer types, analyses of these tumors for AXL expression and AKT3 localization after  
456 treatment may provide clinicians with a much-needed read-out for treatment efficacy. Lastly, we  
457 propose that selective inhibition of AKT3 may represent a novel therapeutic avenue for treating  
458 aggressive and recurrent cancer that avoids toxicity associated with pan-AKT inhibition.

459 **Materials and Methods**

460

461 **Reagents**

462 The following antibodies were used for immunoblotting (IB) at 1:1,000 unless otherwise stated:

463 Anti-AXL (8661S, Cell Signaling, IHC 1:500), anti-phospho AXL y702 (5724, Cell Signaling),

464 anti-phosphoserine (AB1603, Millipore), anti-TBK1 (3013S, Cell signaling), anti-TBK1 (ab40676,

465 Abcam, IF 1:250), anti-TBK1 (NB100-56705AF647, Novus, FC 1:100), anti-pTBK1 s172

466 (5483S, Cell Signaling), anti-SNAIL (3879, Cell Signaling), anti-SLUG (9585, Cell Signaling),

467 anti-SLUG-AF488 (NBP2-74235AF488, Novus, FC 1:100), anti-E-cadherin (clone 24E10,

468 3195S, Cell Signaling; IB 1:1000; IHC 1:400), anti-N-cadherin (14215S, Cell Signaling), anti-B-

469 Catenin (8480, Cell Signaling), mouse anti-human Twist (Twist2C1a, Abcam, IHC),  $\alpha$ -actin

470 (A2066, Sigma, 1:2000), anti- $\alpha$ -tubulin (T6199, Sigma), anti-Vimentin (5741, Cell Signaling; IB

471 1:1000; IHC 1:400), anti-CK19 (ab52625, abcam; IHC 1:1000), anti-AKT1 (2967, Cell

472 Signaling), anti-AKT2 (3063, Cell Signaling), anti-AKT3 (1586912, Millipore, IHC), anti-AKT3

473 (14982, Cell Signaling, IP, IB, and IF 1:250), anti-AKT3 (HPA026441, Sigma, IHC 1:200), anti-

474 AKT3-PE (NBP2-71528PE, Novus, IF 1:250, FC 1:100), anti-pAKT (Ser473) (2971, Cell

475 Signaling), anti-Lamin A/C IgG2b (Santa Cruz, sc-7292), anti-AKT (Cell signaling Technology,

476 9272), anti-Importin  $\alpha$  (I1784, Sigma), anti-GAPDH (2118, Cell Signaling), anti-Phalloidin-AF546

477 (A22283, Invitrogen, IF 1:500), Hoechst 33342 (IF, 1:2000) and anti-FBXW7-PECY7 (NBP2-

478 50403PECY7, Novus, FC 1:100). The following reagents were purchased from Sigma:

479 Cycloheximide (01810-1g), BafA1 (B1793-2UG), MG-132 (474787-10MG). The CRU5-IRES-

480 GFP retroviral vectors for expression of hSNAIL, hSLUG, myrAKT1, myrAKT3, AKT3, shLuc,

481 and shAXL (RFP) were prepared as described (11). CRU5-IRES-GFP retroviral vectors for

482 expression of AKT3-NLS and AKT3-NLS were generated by site-directed mutagenesis (Quik

483 change #2200519). CRU5-IRES-GFP Luciferase AKT3-Luciferase and AKT3-NLS1-Luciferase

484 were generated by cloning. All vectors were confirmed by DNA sequencing. Lentiviral shRNA

485 constructs against human AKT1, AKT2, AKT3, and TBK1 were purchased from Dharmacon  
486 (TBK1, RHS3979-201735457, clone ID: TRCN0000003184)(AKT1, RHS3979-201768650, clone  
487 ID: TRCN0000039797)(AKT2, RHS3979-201732837, TRC00000005630)(AKT3, RHS3979-  
488 201733886, TRCN0000001612). Retroviral production and infections were conducted using  
489 Phoenix A retroviral packaging cells as described (66). Lentiviral production and infection were  
490 conducting using HEK293T cells as previously described (14). Human Gas6 from conditioned  
491 media was prepared as previously described (9). AKTVIII (Sigma), Imatinib (LC laboratories I-  
492 5508) and BGB324/R428, BGB214, were prepared in DMSO. Cell culture, retroviral  
493 transductions, siRNA transfection HMEC strains (4th passage) were established and maintained  
494 as described (67) in M87A medium with oxytocin and cholera toxin (68). PANC1, MDA-MB-231,  
495 4T1, and MCF10A (American Type Culture Collection, Rockville, MD) cells were cultured as  
496 described (11). HMLE and HMLER cells (a gift from Dr. R. Weinberg) were maintained as per  
497 Mani et al (69). TBK1 WT and deficient KIC murine cell lines were established and maintained  
498 as previously described (14). siRNA transfections were conducted as previously described (70).

499

## 500 **CRISPR Knockout**

501 Oligos of the gRNAs were annealed with T4 polynucleotide kinase (New England Biolabs) by  
502 PCR. Annealed oligos were then ligated to PX458 vector with FastDigest BbsI (FD1014,  
503 Thermo Fisher Scientific) and T7 DNA Ligase (M0318, New England Biolabs) by PCR. Mixture  
504 from the reaction was then transformed into the NEB 5- $\alpha$  Competent *E. coli* (High Efficiency).  
505 DNA was extracted from expanded colonies and sent to UTSW sequencing core for  
506 sequencing. Plasmids with correct gRNA sequences or empty vector control were transfected  
507 into *KPFC* cells with Lipofectamine 2000 (11668027, Thermo Fisher Scientific). Positive cells  
508 expressing GFP were sorted as single clones and expanded. Each expanded clone was  
509 subjected to validation through PCR and western blot analysis.

510 Oligos used for the cloning of gRNAs (KO A and KO B) targeting *AKT3* are

511 AKT3 KO A 5'- CACCGAATGGTAACATCGCTCATGA -3'

512 5'- AAATCATGAGCGATGTTACCATTC -3'

513 AKT3 KO B 5'- CACCGCCTCTGCAATCGGTCCGGCTA -3'

514 5'- AAATAGCCGACCGATTGCAGAGGC -3'

515 Primers for PCR validation are

516 AKT3 KO A 5'- AAACCCTAAAACCTGACCTGCAA -3'

517 5'- AGGAAAGACCAACTCTCAGCAC -3'

518 AKT3 KOB 5'- GACATTATTTGCATTCATCCCA -3'

519 5'- GACGCATCCATCTCTTCTTCTC -3'

520

## 521 Immunoblotting and Flow Cytometry

522 Western blot analysis and flow cytometry analysis of cell lines were conducted as previously  
523 described (11). MCF10A cells were treated with TGF $\beta$  (10 ng/ml) for 4 days and then lysed  
524 using NP40 Cell Lysis Buffer (40 mM HepesNAOH, 75 mM NaCl, 2 mM EDTA, 1% NP40,  
525 phosphatase inhibitor cocktail tablet, protease inhibitor cocktail tablet (Roche)). For  
526 immunoprecipitation, antibodies against separate AKT isoforms (1, 2 and 3) and control IgG  
527 antibodies (1 $\mu$ g/lysate) were added to lysates and incubated overnight at 4°C. Next day the pre-  
528 blocked protein-A/G beads (GE Healthcare) in lysis buffer were added and allowed to bind at  
529 4°C for 1 hr. Beads were then washed 3 times (20 mM Tris-HCl (pH 7.5), 150 mM NaCl, 1%  
530 NP40) and protein eluted by boiling in SDS-PAGE loading buffer. Running of SDS/PAGE gel  
531 and immunoblotting were carried out according to standard procedures. Membranes were  
532 probed using anti-pAKT (Ser473) and Pan-AKT antibodies. Nuclear extraction of MDA-MB-231  
533 cells was done according to manufacturer's instructions (Universal Magnetic Co-IP Kit, Active  
534 Motif, 54002). Imaging flow cytometry analysis was conducted on an Amnis Imagestream Mk  
535 (>100,000 events) using the Imagestream software (Tree Star, Inc., Ashland, OR, USA) in the

536 Flow Cytometry Core at UT Southwestern. All Western and flow cytometry results shown were  
537 performed in at least three independent experiments.

538

### 539 **Biochemical assays for AKT activity**

540 An Akt activation assay was used in which PDK1 was used to phosphorylate inactive Akt  
541 enzymes, which then phosphorylated a GSK3 $\alpha$ -derived LANCE *Ultra Ulight*-labelled crosstide  
542 substrate (Perkin Elmer, TRF0106-M). Addition of a Europium-labelled antibody specific to the  
543 phosphopeptide (LANCE *Ultra* Europium-anti-phospho-Crosstide (anti-GSK-3 $\alpha$  Ser21, Perkin  
544 Elmer, TRF0202-M) allows proximity-dependent energy transfer from the Europium donor to the  
545 *Ultra Ulight*<sup>TM</sup> acceptor. Briefly, 5  $\mu$ L enzyme in 1X AB (50 mM HEPES pH 7.5, 1 mM EGTA, 10  
546 mM MgCl<sub>2</sub>, 0.01% Tween, 2 mM DTT) was incubated with 2.5  $\mu$ L test compound. To start the  
547 reaction 2.5  $\mu$ L reaction mix was added which consisted of PDK1, lipid preparations, crosstide  
548 and ATP in 1X AB. Final assay concentrations were: 1% DMSO, 5 nM Akt1/5-15 nM Akt2/3-5  
549 nM Akt3 as appropriate, 5 nM PDK1, 5.5  $\mu$ M DOPS, 5.5  $\mu$ M DOPC, 0.55  $\mu$ M PtdIns(3,4,5)P<sub>3</sub>,  
550 100  $\mu$ M ATP, 100 nM crosstide. After 30 min, the reaction was stopped using 5  $\mu$ L 40  $\mu$ M EDTA  
551 in 1X LANCE Detection buffer (Perkin Elmer, CR97-100) for 5 min. For detection, 5  $\mu$ L 8 nM  
552 Europium-anti-phospho-Crosstide antibody in 1X Detection buffer was added to each well and  
553 incubated for 1 h. Plates were read with an EnVision® Multilabel Plate Reader, excitation at 320  
554 nm and emission at 665 nm and 615 nm. Results were converted to percent inhibition of  
555 phosphorylation by normalizing to positive and negative controls, and compound IC<sub>50</sub> was  
556 determined using a 3-parameter equation (Prism, GraphPad).

557

### 558 **3D culture experiments**

559 Growth factor reduced Matrigel (Corning, 10–12 mg/mL stock concentration, catalog no.  
560 354230) and bovine (Corning, catalog no. 354231) or rat tail (Corning, catalog no. 354236)  
561 Collagen I were used for organotypic culture experiments. Vertical invasion assays and

562 experiments in three-dimensional (3D) culture were performed and quantified as described  
563 previously (71) using a Matrigel/Collagen I matrix (3–5 mg/mL Matrigel and 1.8–2.1 mg/mL  
564 Collagen I). A 120- $\mu$ m span on the z-axis is shown for the vertical invasion assays.

565

#### 566 **Mammosphere and tumorsphere formation assay**

567 Mammosphere cultures were performed as previously described (72). Single cells were plated  
568 in ultra-low attachment plates (Corning, Acton, MA, USA) at a density of 20,000 viable cells/ml.  
569 Total mammospheres per well were quantified using ImageJ.

570

#### 571 **Gene Expression Analysis and RNA sequencing**

572 The expression analysis of the breast cancer cell lines and human samples (cancer, normal)  
573 was performed from published and GEO-submitted Affymetrix data as described (Kilpinen et al.,  
574 2008). Global gene expression analysis of HMEC lineage was performed on FACS sorted  
575 (FACSVantageSE) pre-stasis HMEC (4th passage) cells. Total RNA from FACS-enriched  
576 primary culture cells were isolated with TRIzol (Invitrogen) and RNeasy Mini column (Qiagen)  
577 and evaluated using Bioanalyzer (Agilent Technologies). Gene expression levels were  
578 measured using the Illumina HumanHT-12 v4 Expression BeadChip whole-genome expression  
579 array. The Illumina Bead Array data were quality controlled in Genome Studio and both probe  
580 level and gene level data were imported into JExpress Pro (<http://jexpress.bioinfo.no>) for  
581 analysis. After quantile normalization both datasets were log<sub>2</sub> transformed. Correspondence  
582 Analysis (Fellenberg et al., 2001) was performed on the datasets, together with Hierarchical  
583 Clustering of the samples using a Pearson correlation measure on a per gene mean centered  
584 version of the data. Differentially expressed genes between AXL<sup>+</sup> and AXL<sup>-</sup> groups were  
585 identified using the Rank Product method on both datasets (Breitling et al., 2004). The resulting  
586 lists of differentially expressed genes with a false discovery rate value  $q=10\%$  from these two  
587 analysis was considered differentially expressed between the two groups. Cells were plated on

588 10 cm dishes until cell densities of 70% were achieved. Total RNA was extracted from cells  
589 using QIAGEN RNeasy Mini kit and stored at -80°C. 1 µg total RNA per sample were subjected  
590 to library generation using the TruSeq stranded total RNA sample preparation kit, according to  
591 the manufacturer's protocol (Illumina). The libraries were pooled and sequenced on a NextSeq  
592 500 instrument (high output flowcell) at 1x75 bp single end reads (Illumina). Raw RNAseq reads  
593 were aligned against to the human genome release GRCh38/hg38 using HISAT2 (73) and  
594 exons were counted using RSubread.featureCounts (74). Libraries were filtered to remove gene  
595 counts of less than 1 CPM across all libraries and normalized. Differentially expressed genes  
596 between GFP control group and AKT3 overexpressing MCF10A cells were calculated using  
597 edgeR (75, 76). Genes were considered differentially expressed with a fold change >2 and  
598  $p < 0.05$ .

599

#### 600 **AKT3 score and Metabric dataset**

601 To assess the influence of AKT3 signaling and its downstream targets on survival of breast  
602 cancer patients, genes that were found to be differentially expressed after AKT3 overexpression  
603 in MCF10A cells were used to generate an AKT3 score. The score essentially represented the  
604 sum of expression of 42 differentially expressed genes, adjusted for expected directionality.  
605 Initially, we examined 46 different genes, but only 42 of them were represented with probes on  
606 the expression array. For genes represented by multiple probes (the 42 genes mapped to 71  
607 different probes), mean signal intensity was used. The influence on breast cancer specific  
608 survival and the putative difference between molecular subtypes was investigated in the  
609 Metabric cohort, composed of 1980 breast cancer patients enrolled at five different hospitals in  
610 the UK and Canada (77). Gene expression was assessed using the Illumina HT-12 v3  
611 microarray and normalized data was downloaded from the European Genome-phenome  
612 Archive (EGA) data portal. Missing values were imputed using the impute.knn function as  
613 implemented in the R library 'impute' with default settings (Hastie T, c R, Narasimhan B and

614 Chu G (2016). Impute: Imputation for microarray data. R package). The data was batch  
615 adjusted for hospital effect using the pamr.batchadjust function in the 'pamr' library with default  
616 settings (T. Hastie, R. Tibshirani, Balasubramanian Narasimhan and Gil Chu (2014). Pam:  
617 prediction analysis for microarrays). Association between the score and molecular subtypes (77,  
618 78) was tested using Kruskal-Wallis rank test, and correlations were estimated with Spearman's  
619 rank correlation. Survival analyses were performed using Cox proportional hazards regression  
620 model as implemented in the R library 'rms' (Frank E Harrell Jr (2016). rms: Regression  
621 Modeling Strategies). Survival plots were generated using the survplot function, as implemented  
622 in the rms library. All analyses were performed using R version 3.3.1.

623

#### 624 **Confocal Microscopy**

625 Cells were plated on coverslips (79.5, Marienfeld-Superior) overnight under low serum (1%)  
626 conditions. Cells were fixed with 4% formaldehyde diluted in warm PBS for 15 min, washed 3  
627 times, blocked, and permeabilized with 5% goat serum, 0.3% Triton X100 in PBS for 1h. Cells  
628 were incubated with the appropriate primary antibody overnight followed by 3 wash steps with  
629 PBS and secondary antibody incubation for 2h in 5% BSA in PBS. After 3 wash steps with PBS,  
630 coverslips were mounted on slides with Prolong Diamond Antifade Reagent (Thermo Fisher).  
631 The images were acquired using Leica SP5, Leica SP8, Zeiss LSM780, or Zeiss LSM880  
632 inverted microscopes.

633

#### 634 **Immunohistochemistry**

635 Paraffin-embedded Human PDAC samples were provided by the Tissue Management Shared  
636 Resource within the Simmons Comprehensive Cancer Center at UT Southwestern. Both AXL  
637 and AKT3 antibodies were optimized and stained using a Leica Autostainer. Paraffin-embedded  
638 normal human breast tissue sections (n=20; generously provided by Dr. A.Borowsky) were  
639 prepared for immunofluorescence and stained with as previously described (Garbe et al., 2012).



640 For N-cadherin analysis, antigen retrieval was performed by boiling for 20 min at in Tris EDTA  
641 buffer, pH 9 in a microwave oven. A Dako Autostainer was used for staining. The slides were  
642 incubated 60 minutes at room temperature with a monoclonal antibody against N-cadherin  
643 (M3613), dilution 1:25 (Dako). Immunoperoxidase staining was carried out using the Dako  
644 Envision Kit with diaminobenzidin tetrachloride peroxidase. For analysis of Twist-2, antigen  
645 retrieval was performed by boiling in TRS buffer (pH 6.0) (Dako) for 25 minutes, and incubated  
646 for 1 hr in room temperature with the rabbit polyclonal antibody Twist-2 diluted 1:500, and  
647 stained with HRP EnVision rabbit (Dako) for 30 minutes in RT. The peroxidase was localized by  
648 the diaminobenzidine tetrachloride peroxidase reaction and counterstained with Mayer`s  
649 hematoxylin. For Axl analysis, the sections were boiled in TRS buffer (pH 6.0) (Dako) in 20  
650 minutes, followed by incubation overnight at room temperature with goat IgG antibody Axl,  
651 dilution 1:50 (R&D AF854) and stained with EV rabbit for 30 minutes. The peroxidase was  
652 localized by the diaminobenzidine tetrachloride peroxidase reaction and counterstained with  
653 Mayer`s hematoxylin. The human breast cancer tumor sections were obtained from the IRO  
654 database and assayed for quality control by a pathologist. IHC staining was carried out using  
655 DAKO, EnVision™ FLEX kit with DAB before counterstaining with hematoxylin (DAKO,  
656 EnVision™ FLEX Hematoxylin K8008). Stained samples were acquired using with Zeiss Axio  
657 Observer Z1 microscope and analyzed with TissueGnostics software for acquisition and  
658 analysis. Representative regions were analyzed from each sample slide and mean intensity of  
659 DAB-AKT3 staining from nuclei and cytoplasm was used to separate nuclear AKT3 cases from  
660 cytoplasmic AKT3 cases.

661

## 662 **Animal studies**

663 *Syngenic pancreatic cancer model:*

664

665

666 *KPFC* (CAS9-EV, AKT3 KO, Rescue) cells were injected orthotopically ( $2.5 \times 10^5$  cells) in 6- to  
667 8-week-old C57BL/6 mice. 19 days after tumor cell injection mice were sacrificed and organs  
668 were harvested for analysis. All animals were housed in a pathogen-free facility with 24-h  
669 access to food and water. Animal experiments in this study were approved by and performed in  
670 accordance with the institutional animal care and use committee at the UTSW Medical Center at  
671 Dallas. Before implantation, cells were confirmed to be pathogen free.

672

673 *Tumor cell titration studies:*

674 Xenograft tumor-initiation studies were conducted as described by (80). HMLER cells (GFP,  
675 myrAKT1, myrAKT3 or AKT3) were suspended in DMEM/Matrigel (1:1) in 50  $\mu$ L and injected  
676 subcutaneously into 3-6 weeks old NOD-SCID mice. Tumor incidence was monitored with hand  
677 held caliper for up to 60 days after injection; tumor threshold was set at 20 mm<sup>3</sup> (AKT3) or 25  
678 mm<sup>3</sup> (myrAKT3). Animals were treated with BGB214 dissolved in 0.5% HPMC/0.1% Tween 80  
679 (Vehicle) as indicated in figure legends starting at the day of cell injection. For some studies,  
680 cells were treated for 24 hrs with 0.54  $\mu$ M BGB214 prior to implantation. Tumor cell titration  
681 animal experiments were approved by The Norwegian Animal Research Authority  
682 and performed in accordance with The European Convention for the Protection of Vertebrates  
683 Used for Scientific Purposes.

684

685 **In vitro kinase assay**

686 1.5  $\mu$ g of recombinant GST-AKT3 (BML-SE369-0005, Enzo Life Sciences), 0.1  $\mu$ g of  
687 Recombinant Active TBK1 (T02-10G-05, SignalChem), and 1  $\mu$ L 10 mM ATP were combined in  
688 kinase reaction buffer (20 mmol/L Tris-HCl pH 7.4, 500 mmol/L  $\beta$ -glycerol phosphate, 12  
689 mmol/L magnesium acetate) up to a total of 30  $\mu$ L. Kinase reaction was carried out at 30°C, 500  
690 rpm for 1hr. After reaction, AKT3 protein was resolved by SDS-PAGE and stained by

691 Coomassie Brilliant Blue. Bands were cut out for MS analysis to identify phosphorylation site by  
692 the UT Southwestern Proteomics core.

693

#### 694 **Statistical analysis**

695 GraphPad Prism 5.0 for PC, and MatLAB were used for statistical analysis using tests stated in  
696 the Figure Legends. Comparisons of histological SI groups were performed by Pearson  $\chi^2$  test  
697 using cut-off values for staining index (SI) categories based on median values. Grouped  
698 analyses were performed with Bonferroni's test for multiple comparisons. Significance was  
699 established when  $p < 0.05$ .

700

#### 701 **Author contributions**

702 ENA, JBL, and RAB conceived and designed the study. ENA, JMW, SH, CET, MB, AM, AV, NP,  
703 SN, AR, JET, TR, VF, DM, and KYA acquired data and performed analysis and interpretation of  
704 data. ENA wrote the manuscript. RAB and JBL reviewed and revised the manuscript. GG, JI,  
705 JBL, and RAB supervised the study.

706

#### 707 **Acknowledgements**

708 We thank Sissel Vik Berge, Karla Sputova, Edward Verwayen, Hallvard Haugen, Marianne  
709 Enger, Michelle Scottn, Anna Boniecka, and Eline Milde for excellent technical support, and to  
710 Dr. Kjell Petersen, the Computational Biology Unit, the University of Bergen, and the Norwegian  
711 Bioinformatics platform for microarray analysis support. Additionally, we thank our UT  
712 Southwestern colleagues Lianxin Hu and Qing Zhang for their input and technical advice. We  
713 would also like to thank the UT Southwestern Proteomics core, Cheryl Lewis, director of the  
714 Shared Tissue Management Resource Core (supported by P30 CA142543), and Angie Mobley,  
715 manager of the Flow Cytometry core. The work was supported by NIH grants R01 CA192381,  
716 R01 CA243577 and U54 CA210181 Project 2 to RAB, the Effie Marie Cain Scholarship in

717 Angiogenesis Research and the Gillson Longenbaugh Foundation to RAB, grants to JBL from  
718 the Norwegian Cancer Society, Norwegian Research Council, Bergen Health Authority and  
719 BerGenBio ASA, as well as CPRIT RP160157 (principal investigator: M. Cobb, UT  
720 Southwestern, Dallas, Texas) and NCI F99 CA253718 to ENA. The funders had no role in study  
721 design, data collection and analysis, decision to publish, or preparation of the manuscript.

722

723

724

725

726

727

728

729

730

731

732

733

734

735

736

737

738

739

740 **References**

741

- 742 1. Wang Z, Li Y, Ahmad A, Banerjee S, Azmi AS, Kong D, et al. Pancreatic cancer:  
743 understanding and overcoming chemoresistance. *Nat Rev Gastroenterol Hepatol*.  
744 2011;8(1):27-33.
- 745 2. Tran DD, Corsa CA, Biswas H, Aft RL, and Longmore GD. Temporal and spatial  
746 cooperation of Snail1 and Twist1 during epithelial-mesenchymal transition predicts for  
747 human breast cancer recurrence. *Mol Cancer Res*. 2011;9(12):1644-57.
- 748 3. Seyfried TN, and Huysentruyt LC. On the origin of cancer metastasis. *Crit Rev Oncog*.  
749 2013;18(1-2):43-73.
- 750 4. Cates JM, Byrd RH, Fohn LE, Tatsas AD, Washington MK, and Black CC. Epithelial-  
751 mesenchymal transition markers in pancreatic ductal adenocarcinoma. *Pancreas*.  
752 2009;38(1):e1-6.
- 753 5. Kudo-Saito C, Shirako H, Takeuchi T, and Kawakami Y. Cancer metastasis is accelerated  
754 through immunosuppression during Snail-induced EMT of cancer cells. *Cancer Cell*.  
755 2009;15(3):195-206.
- 756 6. Puls TJ, Tan X, Whittington CF, and Voytik-Harbin SL. 3D collagen fibrillar microstructure  
757 guides pancreatic cancer cell phenotype and serves as a critical design parameter for  
758 phenotypic models of EMT. *PLoS One*. 2017;12(11):e0188870.
- 759 7. Larue L, and Bellacosa A. Epithelial-mesenchymal transition in development and cancer:  
760 role of phosphatidylinositol 3' kinase/AKT pathways. *Oncogene*. 2005;24(50):7443-54.
- 761 8. Wasif N, Ko CY, Farrell J, Wainberg Z, Hines OJ, Reber H, et al. Impact of tumor grade on  
762 prognosis in pancreatic cancer: should we include grade in AJCC staging? *Ann Surg*  
763 *Oncol*. 2010;17(9):2312-20.
- 764 9. Kirane A, Ludwig KF, Sorrelle N, Haaland G, Sandal T, Ranaweera R, et al. Warfarin Blocks  
765 Gas6-Mediated Axl Activation Required for Pancreatic Cancer Epithelial Plasticity and  
766 Metastasis. *Cancer Res*. 2015;75(18):3699-705.
- 767 10. Koorstra JB, Karikari CA, Feldmann G, Bisht S, Rojas PL, Offerhaus GJ, et al. The Axl  
768 receptor tyrosine kinase confers an adverse prognostic influence in pancreatic cancer  
769 and represents a new therapeutic target. *Cancer Biol Ther*. 2009;8(7):618-26.
- 770 11. Gjerdrum C, Tiron C, Hoiby T, Stefansson I, Haugen H, Sandal T, et al. Axl is an essential  
771 epithelial-to-mesenchymal transition-induced regulator of breast cancer metastasis and  
772 patient survival. *Proc Natl Acad Sci U S A*. 2010;107(3):1124-9.
- 773 12. Ludwig KF, Du W, Sorrelle NB, Wnuk-Lipinska K, Topalovski M, Toombs JE, et al. Small-  
774 Molecule Inhibition of Axl Targets Tumor Immune Suppression and Enhances  
775 Chemotherapy in Pancreatic Cancer. *Cancer Res*. 2018;78(1):246-55.
- 776 13. Du W, and Brekken RA. Does Axl have potential as a therapeutic target in pancreatic  
777 cancer? *Expert Opin Ther Targets*. 2018;22(11):955-66.
- 778 14. Cruz VH, Arner EN, Du W, Bremauntz AE, and Brekken RA. Axl-mediated activation of  
779 TBK1 drives epithelial plasticity in pancreatic cancer. *JCI Insight*. 2019;5.

- 780 15. Ou YH, Torres M, Ram R, Formstecher E, Roland C, Cheng T, et al. TBK1 directly engages  
781 Akt/PKB survival signaling to support oncogenic transformation. *Mol Cell*.  
782 2011;41(4):458-70.
- 783 16. Bellacosa A, Testa JR, Staal SP, and Tsichlis PN. A retroviral oncogene, akt, encoding a  
784 serine-threonine kinase containing an SH2-like region. *Science*. 1991;254(5029):274-7.
- 785 17. Grille SJ, Bellacosa A, Upson J, Klein-Szanto AJ, van Roy F, Lee-Kwon W, et al. The protein  
786 kinase Akt induces epithelial mesenchymal transition and promotes enhanced motility  
787 and invasiveness of squamous cell carcinoma lines. *Cancer Res*. 2003;63(9):2172-8.
- 788 18. Xu W, Yang Z, and Lu N. A new role for the PI3K/Akt signaling pathway in the epithelial-  
789 mesenchymal transition. *Cell Adh Migr*. 2015;9(4):317-24.
- 790 19. Woodgett JR. Recent advances in the protein kinase B signaling pathway. *Curr Opin Cell*  
791 *Biol*. 2005;17(2):150-7.
- 792 20. Irie HY, Pearline RV, Grueneberg D, Hsia M, Ravichandran P, Kothari N, et al. Distinct  
793 roles of Akt1 and Akt2 in regulating cell migration and epithelial-mesenchymal  
794 transition. *J Cell Biol*. 2005;171(6):1023-34.
- 795 21. Sanidas I, Polytaichou C, Hatzia Apostolou M, Ezell SA, Kottakis F, Hu L, et al.  
796 Phosphoproteomics screen reveals akt isoform-specific signals linking RNA processing to  
797 lung cancer. *Mol Cell*. 2014;53(4):577-90.
- 798 22. Chin YR, Yoshida T, Marusyk A, Beck AH, Polyak K, and Toker A. Targeting Akt3 signaling  
799 in triple-negative breast cancer. *Cancer Res*. 2014;74(3):964-73.
- 800 23. Lin FM, Yost SE, Wen W, Frankel PH, Schmolze D, Chu PG, et al. Differential gene  
801 expression and AKT targeting in triple negative breast cancer. *Oncotarget*.  
802 2019;10(43):4356-68.
- 803 24. Turner KM, Sun Y, Ji P, Granberg KJ, Bernard B, Hu L, et al. Genomically amplified Akt3  
804 activates DNA repair pathway and promotes glioma progression. *Proc Natl Acad Sci U S*  
805 *A*. 2015;112(11):3421-6.
- 806 25. Toulany M, Maier J, Iida M, Rebholz S, Holler M, Grottko A, et al. Akt1 and Akt3 but not  
807 Akt2 through interaction with DNA-PKcs stimulate proliferation and post-irradiation cell  
808 survival of K-RAS-mutated cancer cells. *Cell Death Discov*. 2017;3:17072.
- 809 26. Lee HJ, Jeng YM, Chen YL, Chung L, and Yuan RH. Gas6/Axl pathway promotes tumor  
810 invasion through the transcriptional activation of Slug in hepatocellular carcinoma.  
811 *Carcinogenesis*. 2014;35(4):769-75.
- 812 27. Tang Z, Li C, Kang B, Gao G, Li C, and Zhang Z. GEPIA: a web server for cancer and normal  
813 gene expression profiling and interactive analyses. *Nucleic Acids Res*. 2017;45(W1):W98-  
814 W102.
- 815 28. Holland SJ, Pan A, Franci C, Hu Y, Chang B, Li W, et al. R428, a selective small molecule  
816 inhibitor of Axl kinase, blocks tumor spread and prolongs survival in models of  
817 metastatic breast cancer. *Cancer Res*. 2010;70(4):1544-54.
- 818 29. Santi SA, and Lee H. The Akt isoforms are present at distinct subcellular locations. *Am J*  
819 *Physiol Cell Physiol*. 2010;298(3):C580-91.
- 820 30. Engelsen AST, Wnuk-Lipinska K, Bougnaud S, Pelissier Vatter FA, Tiron C, Villadsen R, et  
821 al. AXL Is a Driver of Stemness in Normal Mammary Gland and Breast Cancer. *iScience*.  
822 2020;23(11):101649.

- 823 31. Wentz SR, and Rout MP. The nuclear pore complex and nuclear transport. *Cold Spring*  
824 *Harb Perspect Biol.* 2010;2(10):a000562.
- 825 32. Kosugi S, Hasebe M, Tomita M, and Yanagawa H. Systematic identification of cell cycle-  
826 dependent yeast nucleocytoplasmic shuttling proteins by prediction of composite  
827 motifs. *Proc Natl Acad Sci U S A.* 2009;106(25):10171-6.
- 828 33. Ansieau S, Collin G, and Hill L. EMT or EMT-Promoting Transcription Factors, Where to  
829 Focus the Light? *Front Oncol.* 2014;4:353.
- 830 34. Diaz VM, Vinas-Castells R, and Garcia de Herreros A. Regulation of the protein stability  
831 of EMT transcription factors. *Cell Adh Migr.* 2014;8(4):418-28.
- 832 35. Wang SP, Wang WL, Chang YL, Wu CT, Chao YC, Kao SH, et al. p53 controls cancer cell  
833 invasion by inducing the MDM2-mediated degradation of Slug. *Nat Cell Biol.*  
834 2009;11(6):694-704.
- 835 36. Xiao G, Li Y, Wang M, Li X, Qin S, Sun X, et al. FBXW7 suppresses epithelial-mesenchymal  
836 transition and chemo-resistance of non-small-cell lung cancer cells by targeting snai1 for  
837 ubiquitin-dependent degradation. *Cell Prolif.* 2018;51(5):e12473.
- 838 37. Cuevas IC, Sahoo SS, Kumar A, Zhang H, Westcott J, Aguilar M, et al. Fbxw7 is a driver of  
839 uterine carcinosarcoma by promoting epithelial-mesenchymal transition. *Proc Natl Acad*  
840 *Sci U S A.* 2019;116(51):25880-90.
- 841 38. Yang H, Lu X, Liu Z, Chen L, Xu Y, Wang Y, et al. FBXW7 suppresses epithelial-  
842 mesenchymal transition, stemness and metastatic potential of cholangiocarcinoma cells.  
843 *Oncotarget.* 2015;6(8):6310-25.
- 844 39. Hudis C, Swanton C, Janjigian YY, Lee R, Sutherland S, Lehman R, et al. A phase 1 study  
845 evaluating the combination of an allosteric AKT inhibitor (MK-2206) and trastuzumab in  
846 patients with HER2-positive solid tumors. *Breast Cancer Res.* 2013;15(6):R110.
- 847 40. Yap TA, Yan L, Patnaik A, Tunariu N, Biondo A, Fearon I, et al. Interrogating two  
848 schedules of the AKT inhibitor MK-2206 in patients with advanced solid tumors  
849 incorporating novel pharmacodynamic and functional imaging biomarkers. *Clin Cancer*  
850 *Res.* 2014;20(22):5672-85.
- 851 41. Ma BB, Goh BC, Lim WT, Hui EP, Tan EH, Lopes Gde L, et al. Multicenter phase II study of  
852 the AKT inhibitor MK-2206 in recurrent or metastatic nasopharyngeal carcinoma from  
853 patients in the mayo phase II consortium and the cancer therapeutics research group  
854 (MC1079). *Invest New Drugs.* 2015;33(4):985-91.
- 855 42. Jansen VM, Mayer IA, and Arteaga CL. Is There a Future for AKT Inhibitors in the  
856 Treatment of Cancer? *Clin Cancer Res.* 2016;22(11):2599-601.
- 857 43. Barnett SF, Defeo-Jones D, Fu S, Hancock PJ, Haskell KM, Jones RE, et al. Identification  
858 and characterization of pleckstrin-homology-domain-dependent and isoenzyme-specific  
859 Akt inhibitors. *Biochem J.* 2005;385(Pt 2):399-408.
- 860 44. Lindsley CW, Zhao Z, Leister WH, Robinson RG, Barnett SF, Defeo-Jones D, et al.  
861 Allosteric Akt (PKB) inhibitors: discovery and SAR of isozyme selective inhibitors. *Bioorg*  
862 *Med Chem Lett.* 2005;15(3):761-4.
- 863 45. Wu WI, Voegtli WC, Sturgis HL, Dizon FP, Vigers GP, and Brandhuber BJ. Crystal structure  
864 of human AKT1 with an allosteric inhibitor reveals a new mode of kinase inhibition. *PLoS*  
865 *One.* 2010;5(9):e12913.

- 866 46. Cao D, Maitra A, Saavedra JA, Klimstra DS, Adsay NV, and Hruban RH. Expression of  
867 novel markers of pancreatic ductal adenocarcinoma in pancreatic nonductal neoplasms:  
868 additional evidence of different genetic pathways. *Mod Pathol*. 2005;18(6):752-61.
- 869 47. Anwar T, Rufail ML, Djomehri SI, Gonzalez ME, Lazo de la Vega L, Tomlins SA, et al. Next-  
870 generation sequencing identifies recurrent copy number variations in invasive breast  
871 carcinomas from Ghana. *Mod Pathol*. 2020.
- 872 48. Meric-Bernstam F, Frampton GM, Ferrer-Lozano J, Yelensky R, Perez-Fidalgo JA, Wang Y,  
873 et al. Concordance of genomic alterations between primary and recurrent breast cancer.  
874 *Mol Cancer Ther*. 2014;13(5):1382-9.
- 875 49. Bonin S, Pracella D, Barbazza R, Dotti I, Boffo S, and Stanta G. PI3K/AKT Signaling in  
876 Breast Cancer Molecular Subtyping and Lymph Node Involvement. *Dis Markers*.  
877 2019;2019:7832376.
- 878 50. Konishi H, Kuroda S, Tanaka M, Matsuzaki H, Ono Y, Kameyama K, et al. Molecular  
879 cloning and characterization of a new member of the RAC protein kinase family:  
880 association of the pleckstrin homology domain of three types of RAC protein kinase with  
881 protein kinase C subspecies and beta gamma subunits of G proteins. *Biochem Biophys  
882 Res Commun*. 1995;216(2):526-34.
- 883 51. Santi SA, and Lee H. Ablation of Akt2 induces autophagy through cell cycle arrest, the  
884 downregulation of p70S6K, and the deregulation of mitochondria in MDA-MB231 cells.  
885 *PLoS One*. 2011;6(1):e14614.
- 886 52. Stottrup C, Tsang T, and Chin YR. Upregulation of AKT3 Confers Resistance to the AKT  
887 Inhibitor MK2206 in Breast Cancer. *Mol Cancer Ther*. 2016;15(8):1964-74.
- 888 53. Li Y, Cai B, Shen L, Dong Y, Lu Q, Sun S, et al. MiRNA-29b suppresses tumor growth  
889 through simultaneously inhibiting angiogenesis and tumorigenesis by targeting Akt3.  
890 *Cancer Lett*. 2017;397:111-9.
- 891 54. Grottke A, Ewald F, Lange T, Norz D, Herzberger C, Bach J, et al. Downregulation of AKT3  
892 Increases Migration and Metastasis in Triple Negative Breast Cancer Cells by  
893 Upregulating S100A4. *PLoS One*. 2016;11(1):e0146370.
- 894 55. Chung S, Yao J, Suyama K, Bajaj S, Qian X, Loudig OD, et al. N-cadherin regulates  
895 mammary tumor cell migration through Akt3 suppression. *Oncogene*. 2013;32(4):422-  
896 30.
- 897 56. Mure H, Matsuzaki K, Kitazato KT, Mizobuchi Y, Kuwayama K, Kageji T, et al. Akt2 and  
898 Akt3 play a pivotal role in malignant gliomas. *Neuro Oncol*. 2010;12(3):221-32.
- 899 57. Nakatani K, Sakaue H, Thompson DA, Weigel RJ, and Roth RA. Identification of a human  
900 Akt3 (protein kinase B gamma) which contains the regulatory serine phosphorylation  
901 site. *Biochem Biophys Res Commun*. 1999;257(3):906-10.
- 902 58. Nakatani K, Thompson DA, Barthel A, Sakaue H, Liu W, Weigel RJ, et al. Up-regulation of  
903 Akt3 in estrogen receptor-deficient breast cancers and androgen-independent prostate  
904 cancer lines. *J Biol Chem*. 1999;274(31):21528-32.
- 905 59. Stahl JM, Sharma A, Cheung M, Zimmerman M, Cheng JQ, Bosenberg MW, et al.  
906 Deregulated Akt3 activity promotes development of malignant melanoma. *Cancer Res*.  
907 2004;64(19):7002-10.



- 908 60. Suyama K, Yao J, Liang H, Benard O, Loudig OD, Amgalan D, et al. An Akt3 Splice Variant  
909 Lacking the Serine 472 Phosphorylation Site Promotes Apoptosis and Suppresses  
910 Mammary Tumorigenesis. *Cancer Res.* 2018;78(1):103-14.
- 911 61. Ouchida AT, Kacal M, Zheng A, Ambroise G, Zhang B, Norberg E, et al. USP10 regulates  
912 the stability of the EMT-transcription factor Slug/SNAI2. *Biochem Biophys Res Commun.*  
913 2018;502(4):429-34.
- 914 62. Yu Q, Zhou BP, and Wu Y. The regulation of snail: on the ubiquitin edge. *Cancer Cell*  
915 *Microenviron.* 2017;4(2).
- 916 63. Dang TT, Esparza MA, Maine EA, Westcott JM, and Pearson GW. DeltaNp63alpha  
917 Promotes Breast Cancer Cell Motility through the Selective Activation of Components of  
918 the Epithelial-to-Mesenchymal Transition Program. *Cancer Res.* 2015;75(18):3925-35.
- 919 64. Xiao J, Li W, Zheng X, Qi L, Wang H, Zhang C, et al. Targeting 7-Dehydrocholesterol  
920 Reductase Integrates Cholesterol Metabolism and IRF3 Activation to Eliminate Infection.  
921 *Immunity.* 2020;52(1):109-22 e6.
- 922 65. Gu S, Dai H, Zhao X, Gui C, and Gui J. AKT3 deficiency in M2 macrophages impairs  
923 cutaneous wound healing by disrupting tissue remodeling. *Aging (Albany NY).* 2020;12.
- 924 66. Swift S, Lorens J, Achacoso P, and Nolan GP. Rapid production of retroviruses for  
925 efficient gene delivery to mammalian cells using 293T cell-based systems. *Curr Protoc*  
926 *Immunol.* 2001;Chapter 10:Unit 10 7C.
- 927 67. Labarge MA, Garbe JC, and Stampfer MR. Processing of human reduction mammoplasty  
928 and mastectomy tissues for cell culture. *J Vis Exp.* 2013(71).
- 929 68. Garbe JC, Pepin F, Pelissier FA, Sputova K, Fridriksdottir AJ, Guo DE, et al. Accumulation  
930 of multipotent progenitors with a basal differentiation bias during aging of human  
931 mammary epithelia. *Cancer Res.* 2012;72(14):3687-701.
- 932 69. Mani SA, Guo W, Liao MJ, Eaton EN, Ayyanan A, Zhou AY, et al. The epithelial-  
933 mesenchymal transition generates cells with properties of stem cells. *Cell.*  
934 2008;133(4):704-15.
- 935 70. Vuoriluoto K, Haugen H, Kiviluoto S, Mpindi JP, Nevo J, Gjerdrum C, et al. Vimentin  
936 regulates EMT induction by Slug and oncogenic H-Ras and migration by governing Axl  
937 expression in breast cancer. *Oncogene.* 2011;30(12):1436-48.
- 938 71. Westcott JM, Pechtl AM, Maine EA, Dang TT, Esparza MA, Sun H, et al. An  
939 epigenetically distinct breast cancer cell subpopulation promotes collective invasion. *J*  
940 *Clin Invest.* 2015;125(5):1927-43.
- 941 72. Dontu G, Abdallah WM, Foley JM, Jackson KW, Clarke MF, Kawamura MJ, et al. In vitro  
942 propagation and transcriptional profiling of human mammary stem/progenitor cells.  
943 *Genes Dev.* 2003;17(10):1253-70.
- 944 73. Kim D, Paggi JM, Park C, Bennett C, and Salzberg SL. Graph-based genome alignment  
945 and genotyping with HISAT2 and HISAT-genotype. *Nat Biotechnol.* 2019;37(8):907-15.
- 946 74. Liao Y, Smyth GK, and Shi W. featureCounts: an efficient general purpose program for  
947 assigning sequence reads to genomic features. *Bioinformatics.* 2014;30(7):923-30.
- 948 75. McCarthy DJ, Chen Y, and Smyth GK. Differential expression analysis of multifactor RNA-  
949 Seq experiments with respect to biological variation. *Nucleic Acids Res.*  
950 2012;40(10):4288-97.

- 951 76. Robinson MD, McCarthy DJ, and Smyth GK. edgeR: a Bioconductor package for  
952 differential expression analysis of digital gene expression data. *Bioinformatics*.  
953 2010;26(1):139-40.
- 954 77. Curtis C, Shah SP, Chin SF, Turashvili G, Rueda OM, Dunning MJ, et al. The genomic and  
955 transcriptomic architecture of 2,000 breast tumours reveals novel subgroups. *Nature*.  
956 2012;486(7403):346-52.
- 957 78. Parker JS, Mullins M, Cheang MC, Leung S, Voduc D, Vickery T, et al. Supervised risk  
958 predictor of breast cancer based on intrinsic subtypes. *J Clin Oncol*. 2009;27(8):1160-7.
- 959 79. Bae SS, Cho H, Mu J, and Birnbaum MJ. Isoform-specific regulation of insulin-dependent  
960 glucose uptake by Akt/protein kinase B. *J Biol Chem*. 2003;278(49):49530-6.
- 961 80. Gupta PB, Onder TT, Jiang G, Tao K, Kuperwasser C, Weinberg RA, et al. Identification of  
962 selective inhibitors of cancer stem cells by high-throughput screening. *Cell*.  
963 2009;138(4):645-59.
- 964 81. Huang H, Zhang Y, Gallegos V, Sorrelle N, Zaid MM, Toombs J, et al. Targeting  
965 TGFbetaR2-mutant tumors exposes vulnerabilities to stromal TGFbeta blockade in  
966 pancreatic cancer. *EMBO Mol Med*. 2019;11(11):e10515.
- 967 82. Lieber M, Mazzetta J, Nelson-Rees W, Kaplan M, and Todaro G. Establishment of a  
968 continuous tumor-cell line (panc-1) from a human carcinoma of the exocrine pancreas.  
969 *Int J Cancer*. 1975;15(5):741-7.
- 970 83. Brinkley BR, Beall PT, Wible LJ, Mace ML, Turner DS, and Cailleau RM. Variations in cell  
971 form and cytoskeleton in human breast carcinoma cells in vitro. *Cancer Res*.  
972 1980;40(9):3118-29.
- 973 84. Cailleau R, Olive M, and Cruciger QV. Long-term human breast carcinoma cell lines of  
974 metastatic origin: preliminary characterization. *In Vitro*. 1978;14(11):911-5.
- 975 85. Siciliano MJ, Barker PE, and Cailleau R. Mutually exclusive genetic signatures of human  
976 breast tumor cell lines with a common chromosomal marker. *Cancer Res*.  
977 1979;39(3):919-22.
- 978 86. Soule HD, Maloney TM, Wolman SR, Peterson WD, Jr., Brenz R, McGrath CM, et al.  
979 Isolation and characterization of a spontaneously immortalized human breast epithelial  
980 cell line, MCF-10. *Cancer Res*. 1990;50(18):6075-86.
- 981 87. Tait L, Soule HD, and Russo J. Ultrastructural and immunocytochemical characterization  
982 of an immortalized human breast epithelial cell line, MCF-10. *Cancer Res*.  
983 1990;50(18):6087-94.
- 984 88. Tripathi MK, and Chaudhuri G. Down-regulation of UCRP and UBE2L6 in BRCA2 knocked-  
985 down human breast cells. *Biochem Biophys Res Commun*. 2005;328(1):43-8.
- 986 89. Tripathi MK, Misra S, Khedkar SV, Hamilton N, Irvin-Wilson C, Sharan C, et al. Regulation  
987 of BRCA2 gene expression by the SLUG repressor protein in human breast cells. *J Biol*  
988 *Chem*. 2005;280(17):17163-71.
- 989 90. Elenbaas B, Spirio L, Koerner F, Fleming MD, Zimonjic DB, Donaher JL, et al. Human  
990 breast cancer cells generated by oncogenic transformation of primary mammary  
991 epithelial cells. *Genes Dev*. 2001;15(1):50-65.
- 992

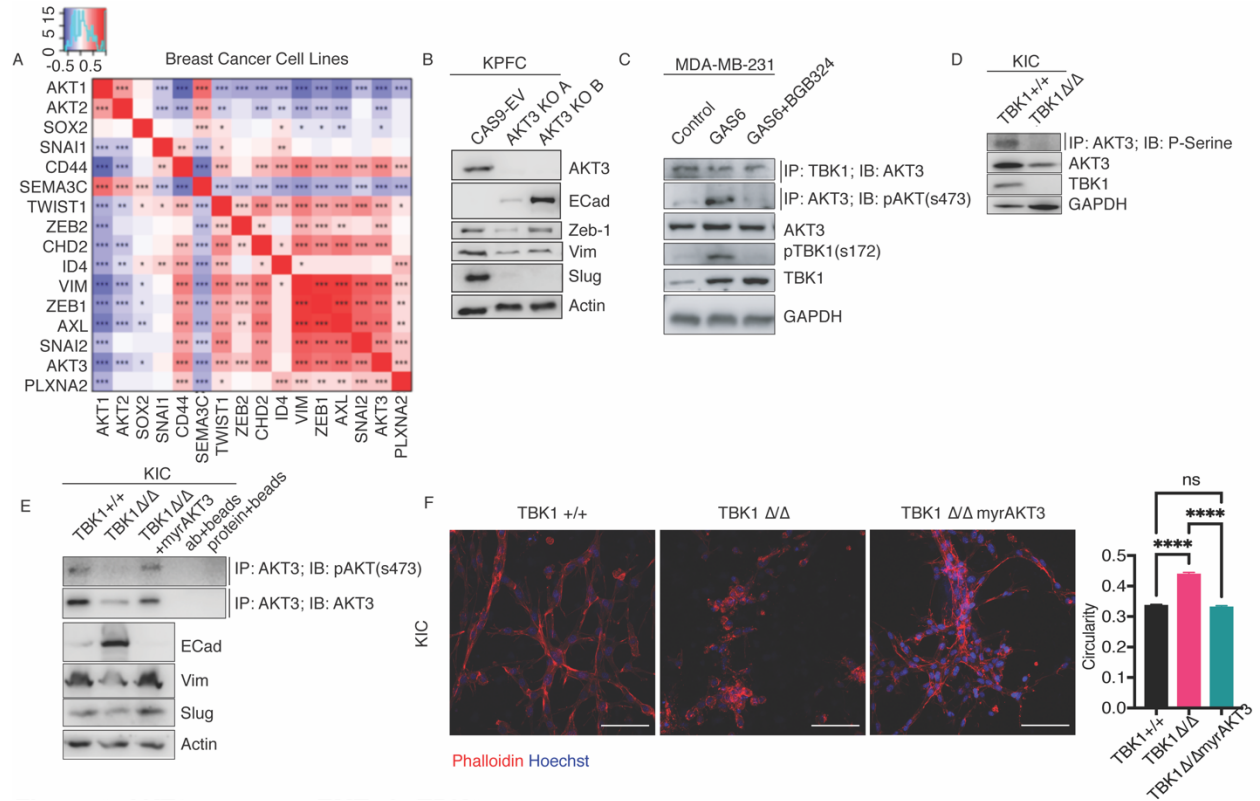

## Figure 1. TBK1 activates AKT3 to promote EMT

**A**) Correlation of AKT1, AKT2, and AKT3 mRNA with EMT and stem cell associated genes in breast cancer cell lines. Positive correlation values are demarcated as red and negative correlation values are shown as blue (\* p<0.045, \*\* p<0.009, \*\*\* p<2x10<sup>-5</sup>; Spearman's correlation test). **B**) Western blot for the indicated target of KPFC PDA control Cas9- empty vector (CAS9-EV) or AKT3 CRISPR-mediated deletion (KO A, KO B). **C**) MDA-MB-231 cells were stimulated with DMSO, GAS6 (200 ng/ml) +/- 2 μM BGB324. Immunoprecipitation of AKT3 was probed for pAKT(s473) and immunoprecipitation of TBK1 was probed for AKT3. Total lysates were probed for AKT3, pTBK1 (s172), TBK1 and GAPDH (loading control). **D**) Immunoprecipitation of AKT3 in TBK1<sup>WT</sup> and mutant (TBK1<sup>Δ/Δ</sup>) KIC PDA cells probed for total phospho-serine. Total lysates were probed for AKT3, TBK1 and Actin (loading control). **E**) Immunoprecipitation of AKT3 in TBK1<sup>+/+</sup>, TBK1<sup>Δ/Δ</sup>, and TBK1<sup>Δ/Δ</sup> KIC PDA cells transduced with myrAKT3 (TBK1<sup>Δ/Δ</sup>- myrAKT3). AKT3 immunoprecipitation was probed for pAKT (s473) and total AKT3. Cell lysates were probed for E Cadherin, vimentin, slug and actin (loading control). Immunoprecipitation controls without protein or antibody are shown. **F**) TBK1<sup>+/+</sup>, TBK1<sup>Δ/Δ</sup>, and TBK1<sup>Δ/Δ</sup>-myrAKT3 cells were plated in collagen/matrigel and stained for Phalloidin (red) and Hoechst (blue). Z-stack (1 μm) images were taken by confocal microscopy at 20X magnification. Scale bar, 100 μm. Circularity of cells was calculated using ImageJ. n > 500 cells/condition. All statistics were done using one-way ANOVA; \* p<0.05, \*\* p<0.01, \*\*\* p<0.001, \*\*\*\* p<0.0001. All representative results shown were reproduced in at least three independent experiments.

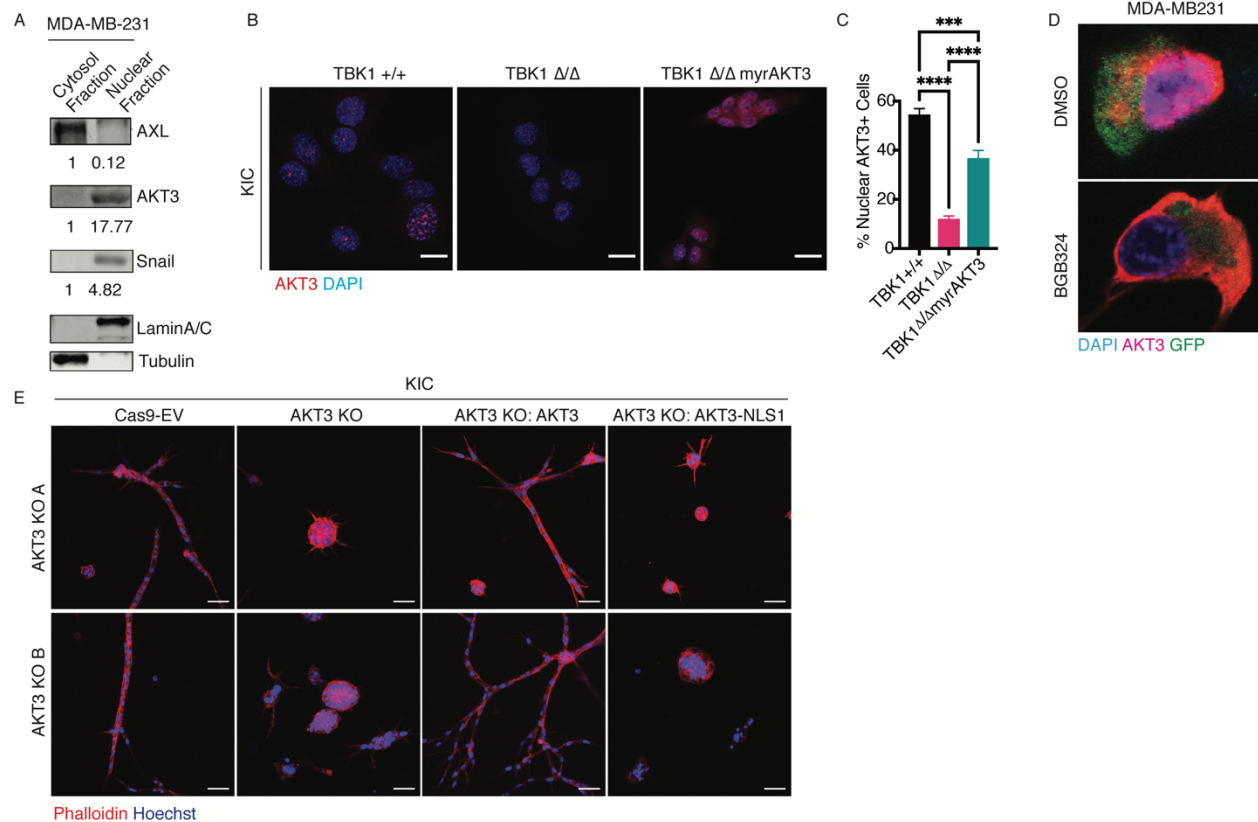

## Figure 2. AXL-TBK1 is required for AKT3 nuclear localization

**A)** Western blot analysis of AXL, AKT3, snail, lamin A/C and tubulin in MDA-MB-231 nuclear and cytoplasmic fractions. Protein expression was quantified and normalized to protein in the cytosol. **B-C)** Immunofluorescence of AKT3 (red) and DAPI (blue) in *TBK1*<sup>+/+</sup>, *TBK1* <sup>$\Delta\Delta$</sup> , and *TBK1* <sup>$\Delta\Delta$</sup> -myrAKT3 KIC PDA cells. Percent of cells with nuclear AKT3 is graphed in (C). Scale bar, 20  $\mu$ m. **D)** Immunofluorescence of MDA-MB-231/GFP cells treated with DMSO or BGB324. Cells are stained with AKT3 (red) and nuclei are stained with DAPI (blue). **E)** KPFC CAS9-EV, AKT3 KO, AKT3 KO cells transduced with AKT3, and AKT3 KO cells transduced with AKT3-NLS1 mutant plated in collagen/matrigel and stained with Phalloidin (red) and Hoechst (blue). Z-stack (1  $\mu$ m) images were taken by confocal microscopy at 20X magnification. Cells were imaged at 20X using confocal microscopy. Scale bar, 50  $\mu$ m. Two different AKT3 KO CRISPR clones are displayed. All representative results shown were reproduced in at least three independent experiments. All statistics were done use one-way ANOVA: \*\*\*,  $p < 0.001$ ; \*\*\*\*,  $p < 0.0001$ .

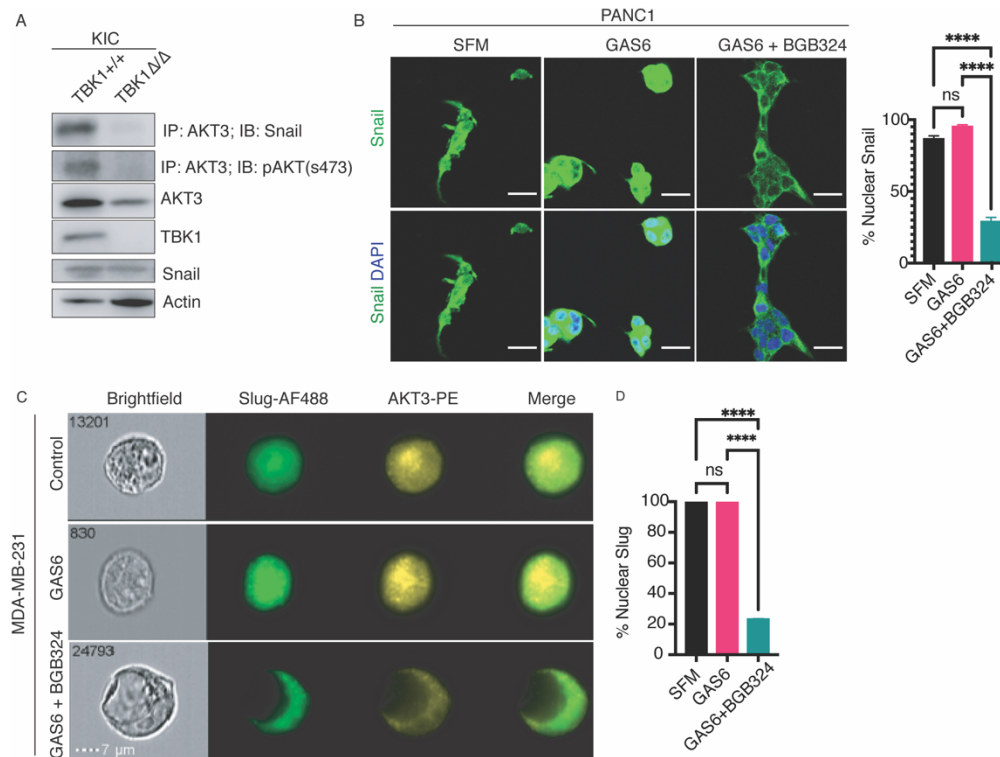

### Figure 3. Snail/Slug is a TBK1-dependent substrate of AKT3

**A**) Immunoprecipitation of AKT3 in primary *TBK1* WT and mutant (*TBK1*<sup>Δ/Δ</sup>) KIC cells were probed for snail and pAKT (s473). Lysates were probed for total snail, AKT3, TBK1, and Actin. **B**) Immunofluorescence of snail (green) and DAPI (blue) in PANC1 cells treated with serum free media (SFM), 200 ng/mL GAS6 +/- 2 μM BGB324 for 12 hrs. Cells were imaged at 20X using confocal microscopy (scale bar, 20 μm) and nuclear snail was quantified, n>200 cells. **C**) Representative images from Imaging Flow cytometry (Amnis Imagestream®) of Slug-AF488 (green) and AKT3-PE (yellow) in MDA-MB-231 cells treated with 200 ng/mL GAS6 +/- 2 μM BGB324 for 6 hrs. Scale bar, 7 μm. **D**) Nuclear localization of slug was quantified in each condition from (C); Control, n=549, GAS6, n=6781, GAS6 + BGB324, n=7730. Slug and AKT3 co-localization was quantified. All representative results shown were reproduced in at least three independent experiments. All statistics were done use one-way ANOVA: \*\*\*\*, p <0.0001.

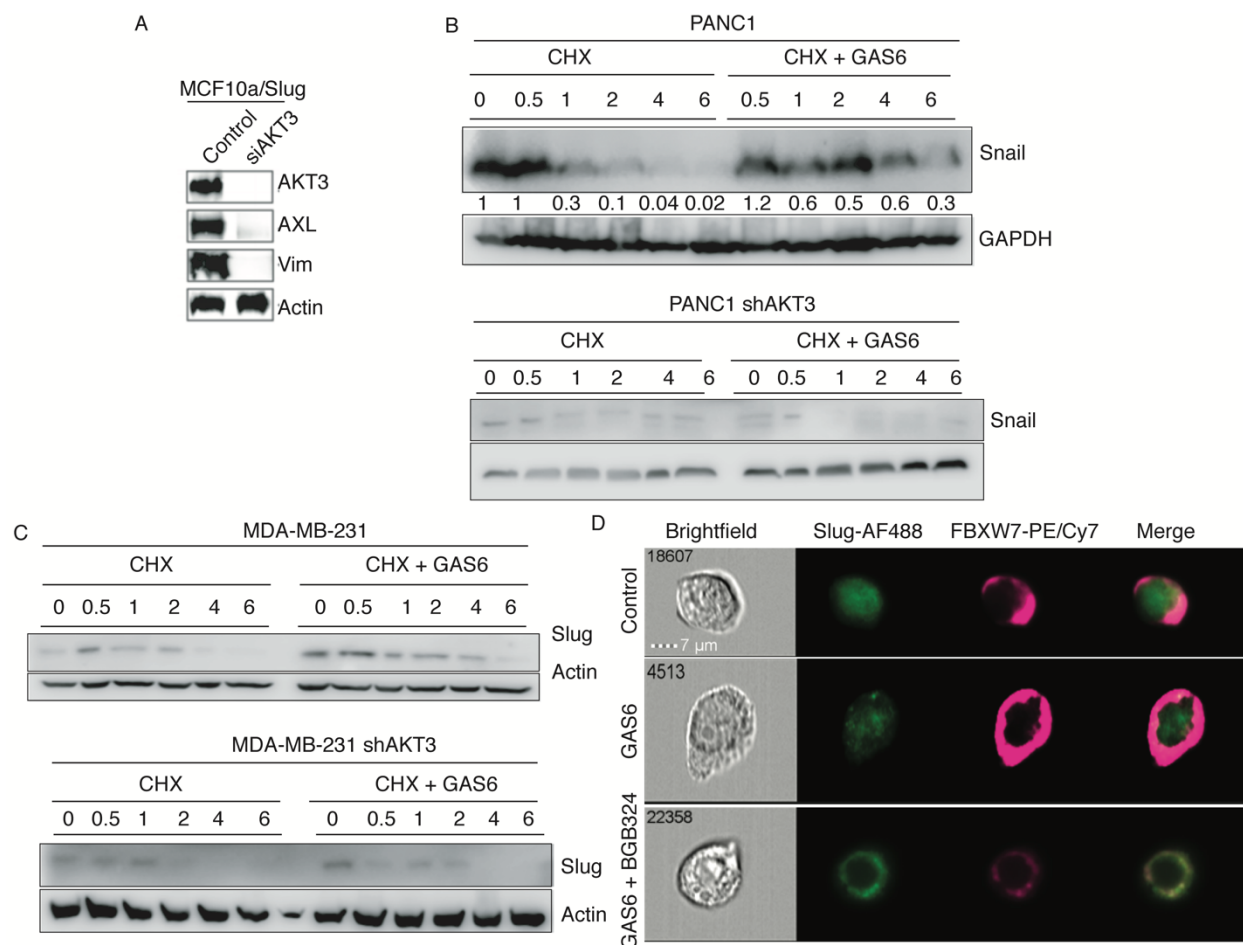

### Figure 4. AXL activity stabilizes snail/slugs via AKT3

**A**) MCF10a/Slug cells transfected with siAKT3 or control. Lysates were probed for AKT3, AXL, vimentin, and actin. **B,C**) PANC1 (**B**) and MDA-MB-231 (**C**) cells transduced with shAKT3 were treated with cycloheximide (CHX, 0.5  $\mu$ g/mL) or CHX + GAS6 (200 ng/mL) and harvested at 30 min, 1, 2, 4, and 6 hrs of treatment. Lysates were probed for snail/slugs and GAPDH/actin. **D**) Representative images from imaging flow cytometry (Amnis Imagestream®) of Slug-AF488 (green) and FBXW7-Pe/Cy7 (pink) in MDA-MB-231 cells untreated or treated with 200 ng/mL GAS6 +/- 2  $\mu$ M BGB324 for 6hrs. Scale bar, 7  $\mu$ m. All representative results shown were reproduced in at least three independent experiments.

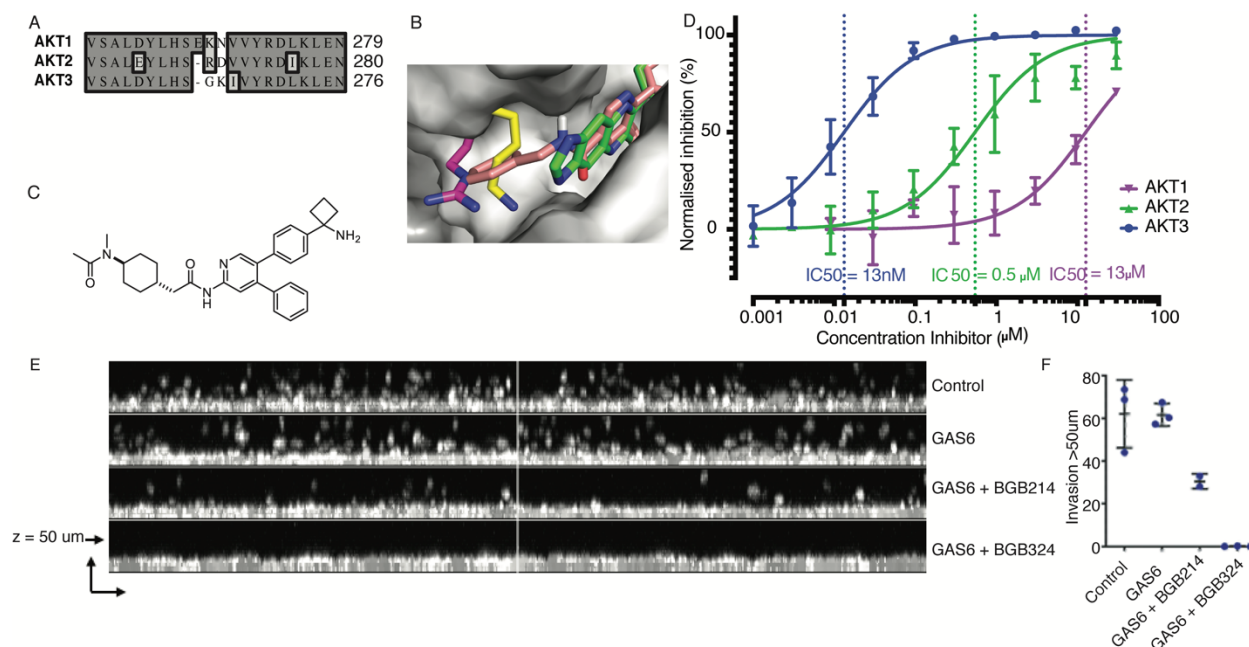

**Figure 5. Efficacy of selective targeting of AKT3 with a novel allosteric small molecule inhibitor.**

**A)** Exploitable differences in sequence between AKT1, AKT2 and AKT3 around the allosteric site include a deletion in AKT2 and AKT3 compared to AKT1, implying that the backbone may follow a different path in these proteins. **B)** Surface view of the front of the allosteric binding site of AKT3, including bound allosteric inhibitor AKT VIII (green). Homology model of AKT3 based on crystal structures of AKT1 bound to AKT VIII (PDB 3o96) and AKT2 kinase domain (PDB1o6k). Side chains from the AKT1 crystal structure (Lys268, yellow) and the AKT2 crystal structure (Arg269, magenta) are superimposed, showing how they impinge on the space made available by the smaller glycine present at this location in AKT3 (Gly265). A molecule with similar structure to BGB214 (pink) docked at the allosteric site clashes with Lys268 of AKT1 (yellow). **C)** Structure of BGB214. **D)** Inhibition of AKT1, AKT2 and AKT3 enzymatic activity on GSK3 $\alpha$ -derived *Ultra U light*<sup>TM</sup>-labelled crossside substrate (n>3). **E)** MDA-MB-231 cells plated in collagen/matrigel and treated with GAS6 +/- 3  $\mu\text{M}$  BGB214 or 2  $\mu\text{M}$  BGB324 for 48 hrs. Z-stack images were taken using confocal microscopy over 50  $\mu\text{m}$ . **F)** Invasion greater than 50  $\mu\text{m}$  was quantified.

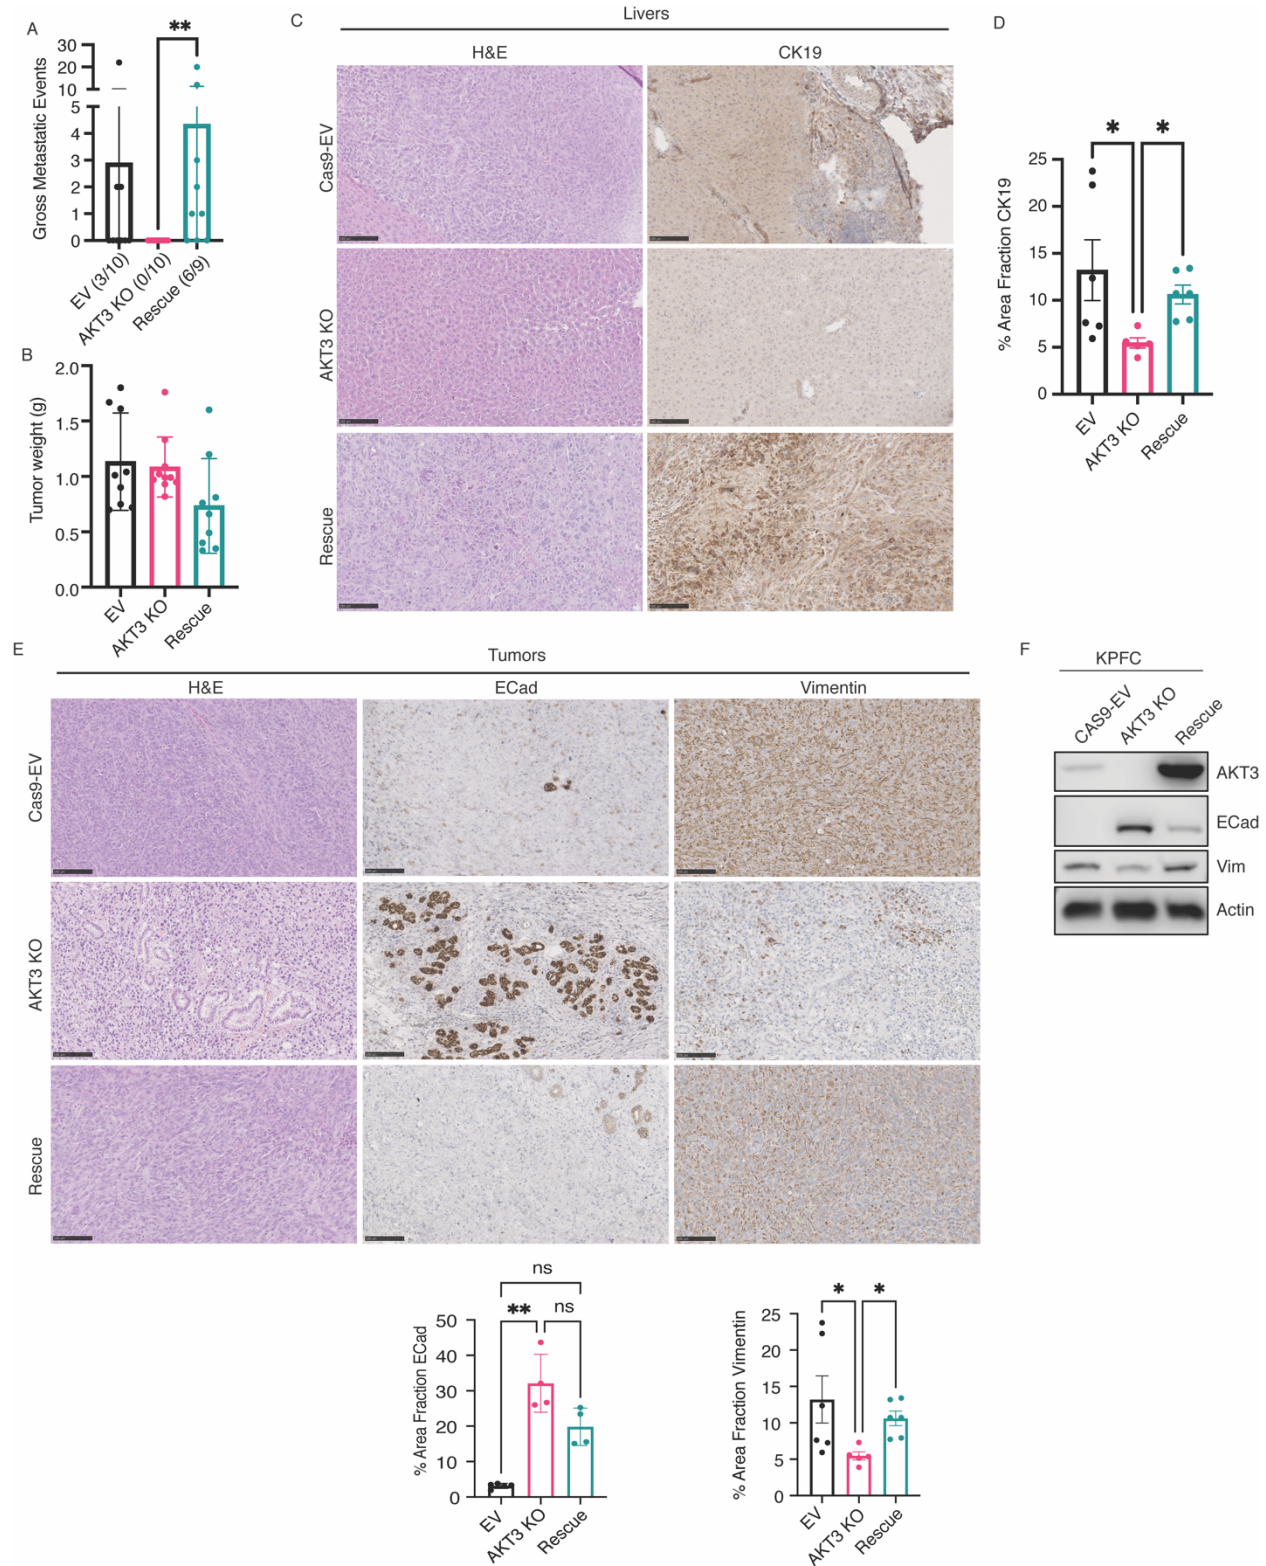

**Figure 6. AKT3 expression is associated with poorly differentiated tumors and increased metastasis.**

C57BL/6J mice were injected orthotopically with 250,000 *KPFC* PDA cells (CAS9-EV, AKT3 KO, or Rescue). **A**) Gross metastases (CAS9-EV: 3/9; AKT3 KO: 0/10; Rescue: 6/9) and **B**)



primary tumor weight was evaluated 19 days after tumor cell injection. **C-D)** Representative images of H&Es and CK19 IHC on livers. CK19 reactivity was quantified as percent of total liver area. **E)** Representative images of tumors stained using H&E and IHC for E-Cadherin and vimentin. Percent area of Ecad and vimentin was quantified. **F)** Western blot of KPFC CAS9-EV, AKT3 KO, and Rescue cells. Cells were lysed and probed for AKT3, Ecad, vimentin, and actin (loading control). All statistics were done using one-way ANOVA: \*,  $p < 0.05$ ; \*\*,  $p < 0.01$ .

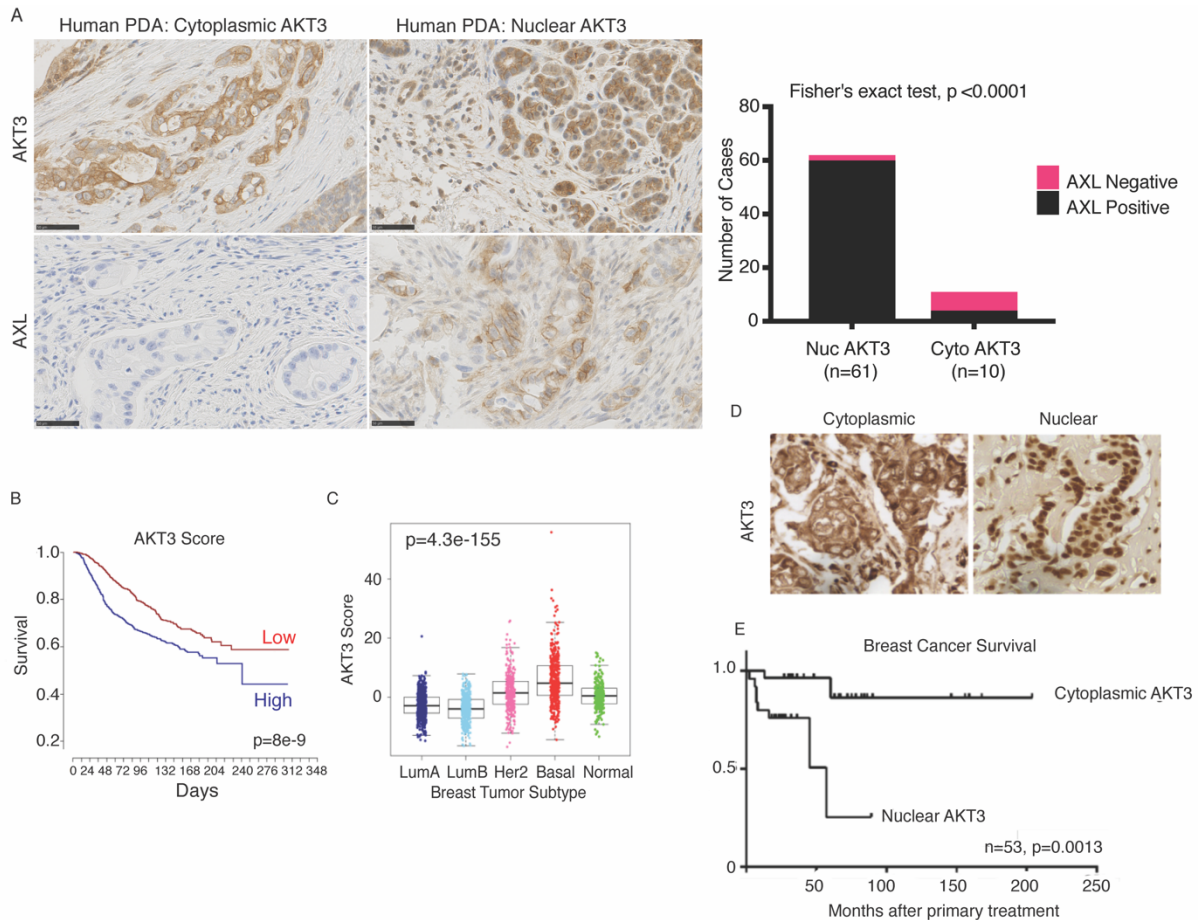

**Figure 7. Nuclear AKT3 is associated with aggressive cancer and worse survival in patients.**

Representative images of IHC staining for AKT3 and AXL in human PDA (n=71). Fisher's exact contingency test was used to calculate if there was a correlation between nuclear AKT3 and AXL positive expression within the tumor. **B**) Kaplan Meier plot indicating that high AKT3 induced expression (AKT3 score) correlated with worse outcome ( $p=8e-9$ ) based on the METABRIC database. **C**) Significant different distribution of the AKT3 score between the PAM50 subtypes ( $p=4.3e-115$ , Kruskal–Wallis test); ER negative tumors were in general enriched for the AKT3 score, particularly Basal-like tumors. **D**) Representative images of IHC staining for AKT3 in human breast cancer samples in **(E)**. AKT3 localization predominantly cytoplasmic (left) or nuclear (right). **E**) Survival analyses of 53 breast cancer patients based on nuclear or cytoplasmic AKT3 localization ( $p=0.0013$  Log rank (Mantel-Cox) test).

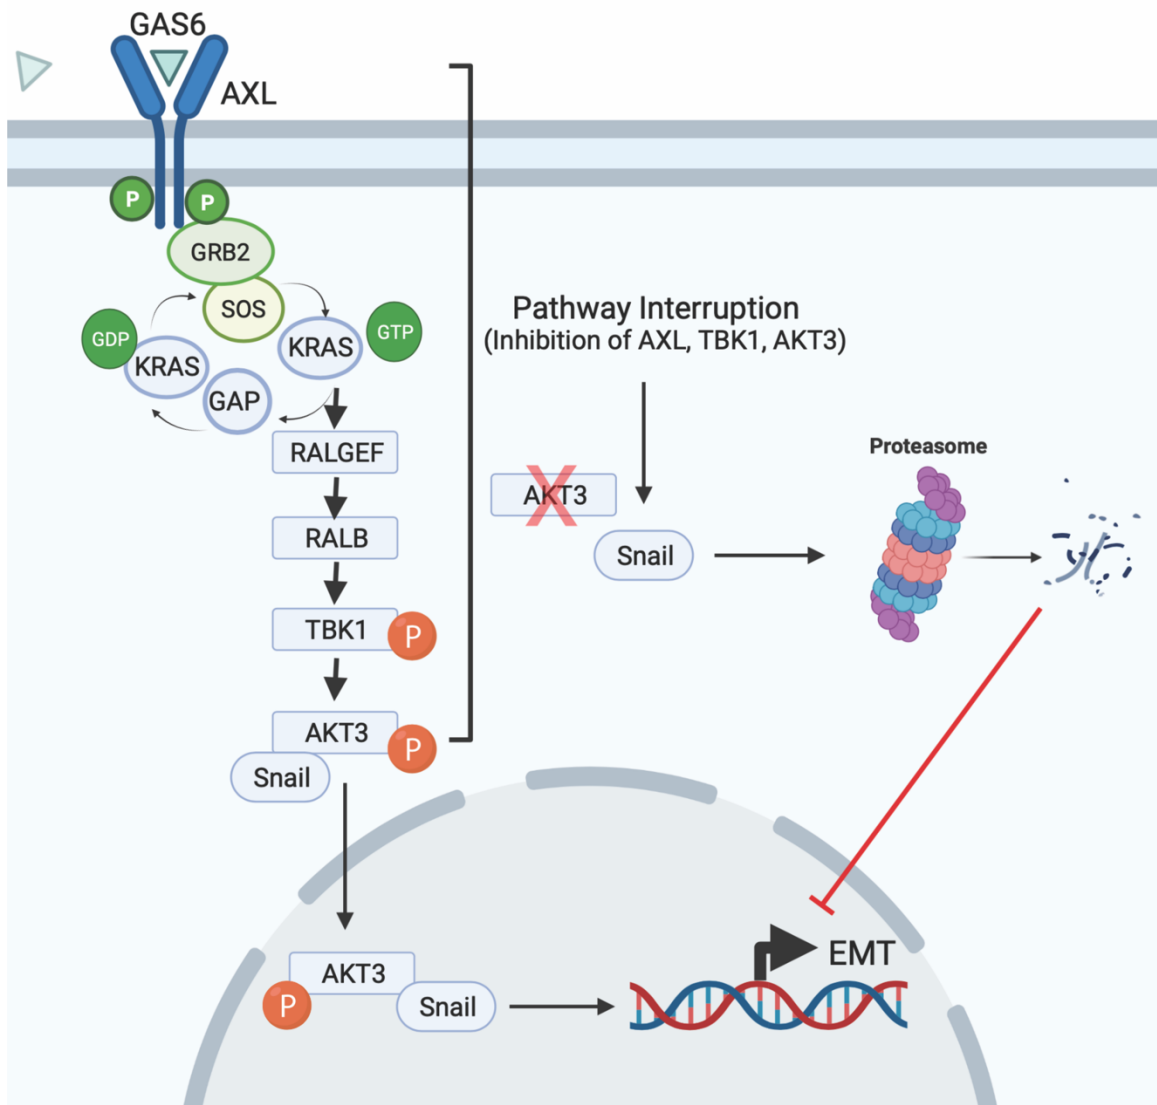

**Figure 8. AXL-TBK1 driven nuclear AKT3 stabilizes slug and snail to promote EMT.**

AXL activation by its ligand GAS6 leads to the stimulation of TBK1 and subsequent activation of AKT3. Activation of AKT3 drives the binding of AKT3 to slug/snail, where they are translocated into the nucleus. The binding of AKT3 to slug/snail protects the EMT-TFs from proteasomal degradation. When this pathway is interrupted and AKT3 is not activated, AKT3 can no longer bind to slug/snail thus leading to proteasomal degradation of the EMT-TFs and a decrease in EMT.
